## **EphrinA4/EphA4 controls blood pressure via arterial sympathetic innervation**

**Emilie Simonnet, #<sup>1</sup> Sabrina Martin, #<sup>1</sup> José Vilar,<sup>2</sup> Emilie Vessieres,<sup>3</sup> Sonia Taib,<sup>1</sup> Virginie Monceau,<sup>1,5</sup> Luc Pardanaud,<sup>2</sup> Nadine Bouby,<sup>4</sup> Anne Eichmann,<sup>2</sup> Jean-Sébastien Silvestre,<sup>2</sup> Daniel Henrion,<sup>3</sup> and Isabelle Brunet,<sup>1\*</sup>**

1. Center for Interdisciplinary Research in Biology (CIRB), College de France, CNRS, INSERM, Université PSL, Paris, France.

2. Université de Paris, PARCC, INSERM, F-75015 Paris, France.

3. U 1083, Angers, France,

4. Centre de Recherche des Cordeliers, INSERM, Sorbonne Université, Université de Paris, F-75006 Paris, France

5. Radiotoxicology and Radiobiology Research Laboratory (LRTOX), Institute of radiation and nuclear Safety (IRSN), Fontenay-aux-roses, France

# Equal contribution

\* Corresponding author

The authors have declared that no conflict of interest exists.

## **Abstract**

**The autonomic sympathetic nervous system innervates peripheral resistance arteries, thereby controlling arterial diameter and modulating blood supply to organs and arterial tone. Despite its fundamental role in blood flow regulation and adaptive response of the cardiovascular system to challenging situations, how sympathetic arterial innervation develops remains poorly understood.**

**We here show that sympathetic arterial innervation is regulated by the axonal guidance molecule EphrinA4 in arterial Smooth Muscle Cells (SMCs), which repels sympathetic axons via the EphA4 receptor. Specific inactivation of EphA4 in sympathetic axons induced a loss of repulsion and increased sympathetic innervation of peripheral arteries throughout life. Functional consequences were a significant increase in arterial tone (resistivity and vasoconstriction), leading to an elevated systemic arterial blood pressure that reached to hypertension under stressful circumstances. These findings identify a novel pathway that negatively regulates sympathetic arterial innervation, and could participate to the appearance of idiopathic resistant hypertension.**

## 1 **Introduction**

2           The sympathetic nervous system innervates internal organs and regulates  
3 physiological body functions but also fine-tunes the adaptative response to challenging  
4 situations; such as stress or immediate danger. Sympathetic neurons aggregate during  
5 development into ganglions to form the sympathetic ganglion chain that lies along the  
6 spinal cord (1). Axonal fibers exit cell bodies and extend over long distances to  
7 innervate smooth muscle cells in internal organs (2–4). To reach their distant targets,  
8 sympathetic axons follow arteries , which produce secreted cues that guide axon  
9 extension (2, 5). This occurs in mice around E15,5. Later during development, starting  
10 from postnatal day 2 (P2), arteries themselves attract sympathetic axons, and  
11 resistance arteries get fully innervated in a lace-like pattern by P10 (6). Neurovascular  
12 junctions (NVJs) form between sympathetic fibers and vascular SMC (vSMC) (7) ;  
13 those varicosities are “en passant” synapses responsible for neurotransmitter release.  
14 Noradrenaline release fosters vSMC contraction and subsequently arteriole  
15 constriction, thereby controlling vascular tone and participating to blood pressure  
16 regulation (8).

17 Netrin-1 and VEGF have been shown to regulate the onset of arterial innervation  
18 guidance and NVJs patterning (6, 9). Netrin-1 is guiding sympathetic axons toward  
19 developing arteries via the neuronal receptor Deleted in Colorectal Cancer (DCC) and  
20 is involved in the maintenance of sympathetic innervation and NVJs formation.  
21 Genetic inactivation of Netrin-1 resulted in a decreased arterial innervation and  
22 reduced NVJ number and size. Remarkably, inactivation of Netrin-1 in adult animals  
23 was sufficient to reduce innervation, suggesting that arterial innervation is a dynamic  
24 and finely regulated process. Of note, sympathetic axons have the ability to regenerate  
25 (10, 11), entailing that sympathetic innervation level can vary over time depending on

26 axonal signaling perceived. At a functional level, the rate of sympathetic innervation in  
27 arteries can be involved in tissue homeostasis and pathological conditions (3, 12). In  
28 the context of essential hypertension, renal artery denervation is still considered as a  
29 potential treatment for resistant hypertension (13). In this line of reasoning,  
30 spontaneous hypertensive rats have hyper-innervated arteries, and sympathectomy  
31 normalizes their blood pressure levels (14). Finally, during pregnancy, preeclampsia is  
32 characterized by a marked increase in peripheral vascular resistance, which reverts to  
33 normal after delivery. Such an increase in blood pressure is mediated, at least in part,  
34 by a substantial activation of sympathetic vasoconstriction (15).

35 This prompted us to asked whether sympathetic innervation of arteries was a regulated  
36 and refined process, during lifetime. We reasoned that the level of innervation could  
37 be finely controlled by a balance of attractive and repulsive cues adapting and  
38 maintaining arterial innervation rate.

## 39 **Results**

### 40 ***EphrinA4/EphA4 trigger sympathetic axon repulsion from arteries***

41 We identified in newly innervated postnatal mesenteric arteries using whole-  
42 mount ISH the expression of EfnA4, which encodes the repulsive axon guidance  
43 molecule EphrinA4. EfnA4 is expressed at the innervation onset by mesenteric  
44 arteries, at Postnatal day 2 (P2) (Figure 1A). EfnA4 is expressed by arterial smooth  
45 muscle cells (SMC) as EfnA4 mRNA was visualized by Fluorescent In Situ  
46 Hybridization in acta2 positive cells of the arterial SMC layer at P2 (Figure 1B).  
47 EphrinA4 is expressed at the membrane of arterial SMC as early as P2, and persists  
48 at P15 in primary arterial vSMC cultured until day 7 *in vitro* (Figure 1C). EphA4, a  
49 protein-tyrosine kinases receptor for EphrinA4 (16, 17), was detected on sympathetic

50 axons (Figure 1D) and neurons (Figure 1E) from the Superior Cervical Ganglion from  
51 P1 to adulthood. To test if EphrinA4 could bind sympathetic neurons, we performed  
52 binding experiments using recombinant Fc-tagged EphrinA4 protein incubated with  
53 sympathetic neurons isolated from wildtype mice and grown *in vitro*. Anti-Fc labeling  
54 showed that EphrinA4 bound to sympathetic axon shafts and growth cones (Figure 1,  
55 F and H). Binding was lost in sympathetic neurons from EphA4-deficient (EphA4<sup>-/-</sup>)  
56 mice (18) (Figure 1, G and H and Supplemental Figure 1, A and B), identifying EphA4  
57 as the obligate EfnA4 receptor on sympathetic axons. As EphrinA4 triggers contact-  
58 mediated repulsion (19), we tested effects of EphrinA4 on sympathetic axons from  
59 wildtype mice *in vitro* using collapse assay which uses the morphology of the growth  
60 cone that collapse after exposure to repellent cues (20). We found that EphrinA4  
61 mediated collapse of sympathetic axons a dose-dependent manner (Figure 1I). The  
62 collapse response was abolished when sympathetic axons isolated from EphA4<sup>-/-</sup>  
63 mice (Figure 1, J and K), demonstrating that EphrinA4-mediated repulsion required the  
64 EphA4 receptor. Hence, arterial SMC expressing EphrinA4 could repel sympathetic  
65 axons via the receptor EphA4.

### 66 ***Loss of EphA4-mediated repulsion leads to increased arterial innervation***

67 To evaluate if EphrinA4 and EphA4 regulated arterial innervation *in vivo*, we  
68 used *EfnA4*<sup>-/-</sup> and *EphA4*<sup>-/-</sup> mice (Supplemental Figure 1, A and B) (in fact *EfnA4*<sup>-/-</sup> is  
69 a triple Knock-out (TKO) resulting in the simultaneous deletion of *Efna1Efna3Efna4*  
70 located in the same genomic region (21), but only EphrinA4 is expressed in arteries  
71 (not shown)). We investigated the onset of arterial innervation in pups at P3. To  
72 visualize sympathetic axons, we stained mesenteries with an antibody against tyrosine  
73 hydroxylase (TH), the rate-limiting enzyme in catecholamine production in the

74 sympathetic nervous system (8, 22), and to visualize arteries, we used an antibody  
75 directed against Smooth Muscle Actin (SMA). We quantified the area of TH+ axons  
76 covering the SMA+ arterial wall at P3 and observed a significant increase of arterial  
77 innervation in EphrinA4<sup>-/-</sup> and EphA4<sup>-/-</sup> mice compared to WT littermates (Figure 2A).  
78 Arterial diameter was not affected (Figure 2B). We then deleted *EphA4* in sympathetic  
79 axons using *EphA4*<sup>fllox/fllox</sup> mice and *TH*-Cre driver lines (23, 24) (hereafter designated  
80 EphA4<sup>fllox</sup>-TH<sup>CRE</sup>). Cre negative littermates were used as controls in this study. While  
81 SCG from EphA4<sup>fllox</sup>-TH<sup>CRE</sup> expressed half of the wildtype EphA4 levels (Figure 2, D  
82 and E and Supplemental Figure 1C), sympathetic arterial innervation was increased  
83 (Figure 2, A-D, Supplemental Figure 1C). Thus, reduction of EphA4 levels by only 50%  
84 is sufficient to enhance arterial innervation.

85 To test if such arterial hyperinnervation persisted throughout adulthood, we evaluated  
86 arterial innervation in 30 days-old mice. Relative EphA4 expression was still  
87 significantly lower in EphA4<sup>fllox</sup>-TH<sup>CRE</sup> animals compared to WT littermates, both at the  
88 mRNA and protein levels (Figure 2E and Supplemental Figure 1D). Arterial innervation  
89 was significantly enhanced by more than 50% in EphA4<sup>fllox</sup>-TH<sup>CRE</sup> mice compared with  
90 control animals while arterial diameter was unaffected (Figure 2, F-H). The number of  
91 EphA4+ neurons was decreased in EphA4<sup>fllox</sup>-TH<sup>CRE</sup> SCG, but the total number of  
92 neurons per SCG was similar and unaffected both during development and in adult  
93 animals (Supplemental Figure 2, A and B).

94 Similarly, arterial innervation was increased in EphA4<sup>-/-</sup> animals using both in whole  
95 mount and cryosection quantification of TH+ fibers density (Supplemental Figure 2, C-  
96 H).

97 As we previously identified Netrin-1 as a positive regulator of arterial innervation  
98 (6), we analyzed arterial innervation level when both Netrin-1/DCC and

99 EphrinA4/EphA4 signaling were altered. We crossed EphA4<sup>-/-</sup> mice with mice  
100 inactivated for Netrin-1 (25) . As the Netrin-1<sup>LacZ/LacZ</sup> mice die at birth, we used the  
101 Netrin-1 heterozygote mice that were already described as exhibiting a significant  
102 decrease of arterial innervation (6). As expected, we found that arterial innervation was  
103 significantly increased in EphA4<sup>-/-</sup> animals compared to WT, whereas a decrease was  
104 seen in the Netrin-1<sup>LacZ/+</sup> animals. Interestingly, EphA4<sup>-/-</sup> Netrin-1<sup>LacZ/+</sup> animals showed  
105 a similar phenotype as the Netrin-1<sup>LacZ/+</sup> animals (Figure 2, I and J). This data suggests  
106 that Netrin-1 is primary required for chemo-attraction of sympathetic axons toward the  
107 artery. Once axons contact the artery, contact-mediated repulsion is occurring via  
108 EphA4-EphrinA4 signaling.

109 In adults, NVJ controls maturation and function of arterial innervation. We  
110 immuno-stained mesenteric arteries with TH and synaptophysin, a pre-synaptic  
111 marker, to visualize NVJ (Figure 2K upper panel). We found a significant increase of  
112 NVJ number in EphA4<sup>flox</sup>-TH<sup>CRE</sup> when compared to control animals. Normalization of  
113 this number with the percentage of innervation per genotype showed no difference,  
114 indicating that the increase of NVJ in EphA4<sup>flox</sup>-TH<sup>CRE</sup> mice is due to a more abundant  
115 innervation, whereas the ratio of NVJ per fiber is conserved (Figure 2, L and M). This  
116 data indicates that there are more NVJ because there are more fibers but there are not  
117 more NVJ per fiber.

118 We visualized NVJ using Transmission Electron Microscopy (TEM) and observed  
119 similar NVJ size, length, synaptic cleft size or mitochondrial composition. Conversely,  
120 the number of adrenergic vesicles per NVJ in the EphA4<sup>flox</sup>-TH<sup>CRE</sup> mice increased  
121 compared to control animals (Figure 2, N-P and not shown).

122 In conclusion, loss of EphrinA4-EphA4 signaling leads to an increased arterial  
123 innervation density that remains during adulthood and leading to over-numbered NVJ.

124 **Functional consequences of an increased arterial innervation**

125 To address the physiological consequences of altered sympathetic innervation,  
126 we investigated cutaneous vasoconstriction in response to cold using laser Doppler  
127 perfusion imaging. We anesthetized mice and imaged cutaneous blood flow of the paw  
128 in adult EphA4<sup>flox</sup>-TH<sup>CRE</sup> and WT littermates. Blood flow is color coded, red indicating  
129 a high blood flow, and blue low blood flow. Under anesthesia, body temperature  
130 dropped from 37.5°C to 33.5°C. We quantified cutaneous blood flow every degree's  
131 drop. As expected, WT animals showed significant decrease of cutaneous blood flow  
132 in response to cold (between 35.5°C and 34.5°C), indicating that vasoconstriction  
133 occurs to maintain body core temperature. EphA4<sup>flox</sup>-TH<sup>CRE</sup> mice displayed a more  
134 rapid (between 36.5°C and 35.5°C) and efficient vasoconstriction (Figure 3, A and B  
135 left panel) consistent with their increased arterial innervation. Prazosin, an inhibitor of  
136 alpha-adrenergic receptors that mediate contraction of the arterial SMC upon release  
137 of catecholamines, was then injected to animal prior experiment. Inhibition of alpha-  
138 adrenergic receptors that mediate contraction of the arterial SMC upon release of  
139 catecholamines using Prazosin treatment abolished vasoconstrictive response in both  
140 wildtype and EphA4<sup>flox</sup>-TH<sup>CRE</sup> mice suggesting that the change in vasoconstriction  
141 efficacy observed could be directly linked to the enhanced sympathetic arterial  
142 innervation and NVJ numbers observed in EphA4<sup>flox</sup>-TH<sup>CRE</sup> mice (Figure 3, A and B  
143 right panel). Furthermore, the pulsatility and resistivity index was significantly raised in  
144 the carotid artery of EphA4<sup>flox</sup>-TH<sup>CRE</sup> animals compared to controls (Figure 3, C and  
145 D), while arterial diameter and wall thickness were unaffected (Supplemental Figure 3,  
146 E-H); in line with a possible increased blood flow and vascular tone. To examine  
147 potential changes in arterial wall properties we analyzed arterial wall anatomy using  
148 histochemistry. Aortic and mesenteric arteries wall thickness as well as the number



149 and size of SMC layers were unaffected (Figure 3E and Supplemental Figure 3, A-D).  
150 Molecular composition was then assessed. RNA extracted from adult second order  
151 mesenteric arteries revealed no significant changes in genes expression  
152 characterizing mural cell contractility pathways such as *acta2*, Calponin, Desmin,  
153 Smoothelin and Smooth muscle protein 22-alpha or SM22a (Figure 3F) between  
154 genotypes.  
155 Therefore, arterial anatomical and molecular composition as well as physiological  
156 response was similar between WT and EphA4<sup>flox</sup>-TH<sup>CRE</sup> mice. Thus, differences  
157 observed in vasoconstriction efficacy and occurring at a higher temperature, as well as  
158 enhanced pulsatility and resistivity, are likely associated with arterial sympathetic  
159 hyperinnervation. Inhibition of SMC-induced vasoconstriction in presence of Prazosin  
160 corroborates the involvement of sympathetic innervation.

161 We then assessed *ex vivo* vasoreactivity of first (not shown) and second order  
162 mesenteric arteries. There was no difference in Phe-mediated vasoconstriction and in  
163 Ach and SNP-mediated vasorelaxation between groups ( $n=14$  and 18 vessels from 7  
164 and 9 WT and EphA4<sup>flox</sup>-TH<sup>CRE</sup> mice respectively). Similarly, vasoreactivity was not  
165 different between WT and EphA4<sup>flox</sup>-TH<sup>CRE</sup>, and both genotypes responded similarly  
166 with or without prazosin (Figure 3, G-J). This observation indicates that arterial wall  
167 resistance enhancement in EphA4<sup>flox</sup>-TH<sup>CRE</sup> is due to the sympathetic innervation and  
168 tone, but when *ex vivo* arteries are missing sympathetic input from the sympathetic  
169 ganglion chain, arteries of both genotypes behave similarly.

170           ***Sympathetic peripheral arterial resistance induces high blood pressure***  
171 ***independently of heart rate and renal regulation.***

172           To investigate the potential physiological role of enhanced sympathetic  
173 innervation in peripheral resistance arteries, we recorded mice vital parameters  
174 including mice activity, arterial blood pressure, heart rate using telemetry (Figure 4A).  
175 We recorded parameters during the implant post-surgery recovery, as we assumed  
176 this could constitute already a challenging condition. We then let mice recover during  
177 7 days without recording and then recorded freely moving animals for 48 hours.  
178 Parameters were normalized over this time window and constituted the basal state of  
179 each animal after a full recovery. Finally, we introduced a new adult male in the cage  
180 of the recorded animal, inducing an acute stress. We found that whatever the situation,  
181 the mean arterial blood pressure (MAP) was significantly and sustainably higher in  
182 EphA4<sup>flox</sup>-TH<sup>CRE</sup> animals compared to WT littermates (Figure 4B). Notably, introduction  
183 of a new mate in the cage was sufficient to induce substantial hypertension (Figure 4,  
184 A-G). This data provides a proof of concept that an enhanced arterial innervation due  
185 to a lack of repulsion of sympathetic axons could result in hypertension in young  
186 healthy EphA4<sup>flox</sup>-TH<sup>CRE</sup> mice. Arterial blood pressure depends on the vascular  
187 resistance and the cardiac output. However, heart rate was unchanged in EphA4<sup>flox</sup>-  
188 TH<sup>CRE</sup> animals compared to their WT littermates. Furthermore, heart weight, left  
189 ventricle (LV)/total heart, LV ejection fraction and LV shortening fraction as well as 3D-  
190 sympathetic innervation (Supplemental Figure 4, A-H) were unaffected suggesting  
191 that dysregulation of blood pressure is rather due to the enhanced arterial wall  
192 resistivity than to a cardiac effect in our experimental settings.

193           EphA4 is expressed within the brain (18). To test a potential central regulation  
194 of blood pressure, we identified cells expressing EphA4 within the brain using

195 immunostaining. EphA4-positive cells were distinct from the one expressing TH, so  
196 one can reasonably assume that EphA4 was not inactivated within the brain in the  
197 EphA4<sup>flox</sup>-TH<sup>CRE</sup> animals (Supplemental Figure 5, A-E).

198 *EphA4* global knock-out mice develop kidney malformations, namely  
199 hydronephrosis, and thus hypertension (26) . We thus investigated general kidney  
200 anatomy and hydronephrosis in EphA4<sup>flox</sup>-TH<sup>CRE</sup> mice. We found no hydronephrosis in  
201 those animals, suggesting that hydronephrosis was not due to EphA4 signaling in  
202 sympathetic axons but probably due to the role of EphA4 in kidney development and  
203 morphogenesis (26). Masson's trichrome histological analysis revealed no differences  
204 in renal tissue and renal arteriole aspects (Supplemental Figure 4I) while renal  
205 sympathetic innervation of glomeruli was unaffected. Arterial tree and sympathetic  
206 innervation within renal tissue were analyzed in 3D using iDISCO+ protocol. We  
207 quantified sympathetic innervation along arteries and within the kidney and found no  
208 differences between both genotypes (Figure 4, H-J). Similarly, as renal artery  
209 sympathetic innervation could regulate blood pressure and hypertension (27) , we  
210 quantified renal artery innervation and found no difference (Figure 4, K-M). Hence,  
211 EphA4 deletion is not sufficient to induce hyperinnervation, or there is a potential  
212 redundancy of guidance cues, at the vSMC or neuronal level, ensuring appropriate  
213 rate of innervation within the renal arteries. At the functional level, pulsatility and  
214 resistivity index of left and right renal arteries (LRA and RRA, respectively) were not  
215 significantly different between both genotype (Figure 4, I and J). Finally, blood pressure  
216 is mainly regulated by endocrine function of the kidney and more specifically by the  
217 production of Renin, Angiotensin II (AngII) and Aldosterone (28). Serum levels of  
218 Renin, AngII and Aldosterone were not different in our experimental conditions (Figure  
219 4, K-M). Therefore, the hypertensive phenotypes in EphA4<sup>flox</sup>-TH<sup>CRE</sup> mice (Figure 4B)

220 is not due alterations of renal anatomy and function but rather implicates the  
221 hyperinnervation-induced enhanced resistivity of peripheral and resistance arteries  
222 network.

## 223 **Discussion**

224       Interaction between EphrinA4 from vSMC and sympathetic neurons expressing  
225 EphA4 mediates axonal repulsion and regulates the level of sympathetic innervation  
226 of peripheral arteries. Netrin-1 is also expressed by vSMC to attract sympathetic  
227 growth cones toward arteries at the onset of innervation and is involved in the  
228 maintenance of arterial innervation (6). We here demonstrated that guidance of arterial  
229 innervation is orchestrated as growth cone are first attracted by Netrin-1 secretion via  
230 DCC, and then EphrinA4/EphA4 contact-mediated repulsion avoid inappropriate and  
231 supernumerary innervation. As sympathetic axons can regenerate, expression of  
232 molecules regulating proper innervation rate is needed in adults, allowing the  
233 maintenance of appropriate sympathetic innervation. This observation opens the  
234 possibility that sympathetic innervation of arteries could be regulated during the entire  
235 life, meaning that re-innervation of new organs or new arteries could be possible. This  
236 is important in the context of grafts and regenerative medicine, but likely in other fields  
237 such as cancer as the level of arterial innervation is altered in some solid tumors (29,  
238 30). On the same note, arterial innervation rate could be a predictive factor for tumor  
239 aggressivity and metastasis spreading.

240 In addition, when treatment of sympathetic denervation is proposed, as for renal artery  
241 denervation trials, despite the question of denervation efficacy, the transient status of  
242 the denervation process should be taken into account (31).

243 Regarding the involvement of those guidance molecules in synaptogenesis, while  
244 Netrin-1 affects the formation and size of the synapses, EphrinA4 does not seem to  
245 regulate synaptogenesis as neither the ratio nor the morphology of synapses is  
246 affected. Nevertheless, whether Netrin-1 and Ephrin-A4 are expressed by the same  
247 vSMC, or by different cells remain unknown. It has been reported that Netrin-1 and  
248 EphrinA4 could potentiate each other effect, probably by involving the same second  
249 messenger pathways (32, 33) . One can also speculate that some vSMC could be used  
250 as “guidepost” to anchor sympathetic innervation. Given that vSMC layers of  
251 resistance arteries could be seen as a syncytium and that vSMC are a heterogeneous  
252 population, the site of innervation and the level of innervation could thus influence the  
253 entire structure. One can therefore speculate that 1) “pacemaker” cells need to have a  
254 really refined level of innervation and 2) syncytium receiving an inadequate enhanced  
255 innervation would increase the resistivity of the entire muscular tissue layer of the  
256 artery. This hypothesis is supported by the observation that EphA4<sup>flox</sup>-TH<sup>CRE</sup> mice  
257 displayed elevated resistivity index observed in EphA4<sup>flox</sup>-TH<sup>CRE</sup> mice, whereas the  
258 general properties and anatomy of the artery (diameter, number of vSMC layer, arterial  
259 wall thickness, gene expression) remained unchanged.

260 Finally, sympathetic innervation of peripheral arteries is increased in EphA4-  
261 deleted mice but remains unchanged in the renal artery and the kidney in general.  
262 Nevertheless, our model shows an elevated arterial blood pressure in steady-state  
263 conditions, which turns into a characteristic hypertension when the wall of the  
264 peripheral arterial network is more strongly innervated by sympathetic axons. The  
265 increased resistivity of the arterial walls network rises blood pressure, independently  
266 of the Renin-Angiotensin-Aldosterone system. We therefore hypothesize that a  
267 substantial number of primary and idiopathic hypertension could be of sympathetic

268 origin. Furthermore, high level of arterial sympathetic innervation could contribute or  
269 aggravate hypertension in everyday life when patients face stressful or challenging  
270 situations. We believe that our results could open up new therapeutic avenues for the  
271 treatment of idiopathic hypertension, especially in young subjects and those whose  
272 hypertension is resistant to conventional treatments.

273 **Methods**

274 **Animal study.** Experiments used males between P1 and P3 or age-matched  
275 littermates. Mice were group housed between 2 and 5 animals per cage with  
276 enrichment in a temperature and humidity-controlled animal facility at 22°C under a  
277 12:12-h light: dark cycle with free access to standard chow (2018C, Teklad Diets) and  
278 water. In telemetry experiments, age-matched male littermates were housed isolated  
279 with enrichment in a temperature- and humidity-controlled animal facility at 22°C under  
280 a 12:12-h light: dark cycle with free access to standard chow (R04, Safe, France) and  
281 water.

282 **Mouse lines.** EphrinA4<sup>-/-</sup>, EphA4<sup>-/-</sup>, EphA4<sup>flox</sup>, Ntn1<sup>LacZ/+</sup> and TH<sup>CRE</sup> mice have been  
283 previously described (18, 21, 23, 24, 25). EphA4<sup>flox</sup> and TH<sup>CRE</sup> mice have been crossed  
284 together to generate EphA4<sup>flox</sup> - TH<sup>CRE</sup> mice. EphA4<sup>-/-</sup> and Ntn1<sup>LacZ/+</sup> mice have been  
285 crossed together to generate EphA4<sup>-/-</sup>-Ntn1<sup>LacZ/+</sup> mice.

286 **Cell culture.** Sympathetic neurons were obtained from Superior Cervical Ganglia  
287 (SCG) from post-natal day 1 (P1) pups. Freshly dissected SCG were digested 1h at  
288 37°C in trypsin 1X (Trypsin 10X, Life technologies, diluted 1:10 in DPBS). Sympathetic  
289 neurons were dissociated, plated on culture slides (11mm diameter, coated with poly-  
290 L-lysine 0,001% (Sigma) and laminin (Sigma) at 10µg/mL) in culture media. Culture  
291 media contains 50% Dulbecco's Modified Eagle Medium (DMEM)-GlutaMAX™  
292 (Gibco®, Life technologies), 50% F12-Nutrient Mixture - GlutaMAX™ (Gibco®, Life  
293 technologies), 10% decomplexed Fetal Bovine Serum (Gibco®, Life technologies)  
294 0.2M Penicillin /Streptomycin (Invitrogen) and was supplemented with Nerve Growth  
295 Factor (NGF - Sigma) at 20ng/mL. Mesenteric arteries were collected from P15 WT  
296 mice and digested at 37°C with elastase (1,25 U/mL, Serabio Technologies) and  
297 collagenase (17,5 U/mL, Sigma) for 2 hours. Smooth muscle cells (SMC) were

298 dissociated and plated on culture slides (11mm diameter, coated with poly-L-lysine 0,0  
299 1% and laminin 10µg/mL) in culture media. Culture media contained the same  
300 ingredients as the one for sympathetic neurons primary cultures, except for NGF. SMC  
301 were maintained in culture for 1 week, changing culture media every two days.

302 **Binding assay.** Rm-EphrinA4/Fc chimera (R&D) was clustered with anti-human Cy<sup>3</sup>  
303 antibody (Sigma) diluted 1: 10 in culture media. Sympathetic neurons were incubated  
304 for 5min at 37°C with EphrinA4/Fc 10µg/mL. Controls were anti-human Cy<sup>3</sup> diluted at  
305 1: 10 in culture media and culture media alone. At the end of the binding experiment,  
306 cells were fixed in DPBS/Para-formaldehyde (PFA) 2%/Sucrose 15% 30min at room  
307 temperature (RT). Red area per growth cone was imaged with a Leica DMRB  
308 Videomicroscope, objective 63X – NA 1.25, equipped with a CCD Coolsnap camera  
309 HD monochrome (Photometrics), using the acquisition software Metamorph 7.8  
310 (Molecular Device) and analyzed using ImageJ. Quantification was done 3 or 4 times  
311 independently by an observer blinded to the experimental condition.

312 **Collapse assay.** Sympathetic neurons were incubated for 10min at 37°C with a control  
313 solution (culture media used for plating) or with a solution of EphrinA4 at the given  
314 concentrations. Sympathetic neurons were fixed with DPBS/ paraformaldehyde (PFA)  
315 2%/Sucrose 15% 30min at room temperature (RT) and immunostained with TH.  
316 Collapsed or un-collapsed growth cones were scored using standard criteria (34).  
317 Quantification was done 3 or 4 times independently by an observer blinded to the  
318 experimental condition.

319 **Cellular immunostaining.** Fixed cells were permeabilized with DPBS/0.1% Triton X-  
320 100 10min at RT, washed in DPBS, blocked 30min at RT in blocking solution  
321 (containing 1% of albumin from Bovine Serum (BSA) – Sigma), incubated in primary  
322 antibody diluted in blocking solution 1h at RT, briefly washed in DPBS, incubated in



323 secondary antibody diluted in blocking solution, briefly washed and mounted on slides  
324 in mounting medium (Dako). Images were acquired with a Yokogawa CSU-W1 type  
325 Spinning Disk, objective 63X (Zeiss PL APO NA 1.4), equipped with Flash 4 Cmos v2+  
326 camera (Hamamatsu), using the acquisition software Metamorph 7.8 (Molecular  
327 Device).

328 **Tissue collection for *in situ* hybridization.** Samples were freshly collected in RNase  
329 free conditions, incubated in toluene, rehydrated in bath of decreasing concentration  
330 of ethanol, digested with K proteinase 10min at 37°C (Invitrogen) and fixed with  
331 DPBS/PFA 4%.

332 ***In situ* hybridization.** *In situ* hybridization with digoxigenin-labeled mouse *Efna4* anti-  
333 sense and sense cDNA was performed on whole mesenteric arteries from P2 mice.  
334 The bound probes were visualized with alkaline-phosphatase-conjugated fab fragment  
335 of antibody to digoxigenin (Boehringer-Mannheim). Images were acquired with a Leica  
336 DMRB microscope, objective 10X – PL Fluotar ON 0.30, equipped with a Nikon  
337 Camera DXM 1200, using the acquisition software NIS Element (Nikon).

338 **RNAscope *in situ* hybridization.** *In situ* hybridization was done on sections of  
339 mesenteric arteries from P2 pups using the RNAscope® Multiplex Fluorescent  
340 Reagent Kit (Advanced Cell Diagnostics, Inc.). *In situ* hybridization protocol was  
341 performed as recommended by the manufacturer. Probes against mouse *Efna4* were  
342 commercially available form Advanced Cell Diagnostics, Inc.

343 **Tissue collection for whole-mount immunostaining.** Mesenteric arteries from P2  
344 pups and ears from adult mice were collected, conserved in cold DPBS upon dissection  
345 and fixed in DPBS/PFA 4% 30min at RT with shaking.

346 **Whole-mount immunostaining.** Samples were blocked 4h in blocking buffer  
347 (containing 10% Tris pH=7.4 (Sigma), 0.5% Blocking Reagent (Perkin Elmer), 0.5%

348 Triton X-100, 0.15M NaCl), incubated in primary antibody diluted in blocking buffer  
349 over-night (O/N) at 4°C with shaking, washed in washing buffer (containing 10% Tris  
350 pH=7.4, 0.05% Triton X-100, 0.15M NaCl), incubated in secondary antibody diluted in  
351 blocking buffer 4h at RT with shaking, washed with washing solution and mounted on  
352 slides with mounting medium (Dako). Images of mesenteric arteries were acquired with  
353 a Leica SP5-MP microscope, objective 63X NA 1.4, using the Leica Acquisition  
354 Software 2.4. Images of adult cutaneous arteries were acquired with a Zeiss Axiozoom,  
355 objective x260, using the acquisition software Zen. TH+ area per artery was analyzed  
356 using ImageJ.

357 **Tissue collection and cryosection.** SCG and mesenteric arteries from adult mice  
358 were dissected and prepared for freezing according to previously described protocol  
359 (35). Samples were quickly frozen in liquid nitrogen, sectioned in 14µm thick sections  
360 and immunostained.

361 **Section immunostaining.** Slides were fixed 10min in cold acetone, drought 30min at  
362 RT, blocked in blocking solution (containing 10% Tris pH=7.4 (Sigma), 0.5% Blocking  
363 Reagent (Perkin Elmer), 0.5% Triton X-100, 0.15M NaCl) 1h at RT, incubated in  
364 primary antibody diluted in blocking solution O/N at 4°C, washed in washing solution  
365 (containing 10% Tris pH=7.4, 0.05% Triton X-100, 0.15M NaCl), incubated in  
366 secondary antibody diluted in blocking solution 2h at RT, washed in washing solution  
367 and covered by coverslips with mounting medium (Dako). TH+, Synaptophysin+ area  
368 per artery section were analyzed using ImageJ.

369 **Antibodies.** *Primary antibodies:* anti-ephrinA4 (Abcam) 1/20 on SMC, anti-EphA4  
370 1/100 on sympathetic neurons (Covalab) and on SCG (R&D), anti-Tuj1 1/200 (R&D),  
371 anti-tyrosine hydroxylase 1/200 (Millipore), anti-synaptophysin 1/500 (BD  
372 Biosciences). *Secondary antibodies:* donkey anti-rabbit 555 and 488 1/200

373 (Invitrogen), donkey anti-mouse IgG<sub>1</sub> 488 1/200 (Invitrogen), donkey anti-mouse IgG  
374 (H+L) 555 (Invitrogen), Streptavidine Amersham Cy<sup>TM</sup> (GE Healthcare), donkey anti-  
375 goat 555 1/200 (Invitrogen). Coupled antibodies: anti-SMA Cy<sup>3</sup> 1/200 (Sigma), anti-  
376 SMA FITC (Sigma).

377 **Tissue collection and inclusion for histological studies.** Mesenteric arteries were  
378 dissected from adult mice, fixed in DPBS/PFA 4% O/N at 4°C with shaking, washed in  
379 DPBS, dehydrated in baths of increasing concentration of ethanol, incubated in xylene  
380 for several minutes at RT and embedded in paraffin. 14µm-thick sections were stained  
381 for elastic fibers using orcein staining. Images were acquired with a Leica DMRB  
382 microscope, objective 63X – HCX-PL APO ON 1.40, equipped with a Nikon Camera  
383 DXM 1200, using the acquisition software NIS Element (Nikon). After dissection, the  
384 kidney, aorta, and heart tissues were fixed for 24 hours in 4% formalin and embedded  
385 in paraffin. 4 µm-thick sections were stained with hematoxylin and eosin for all the  
386 tissues, Sirius red (HES) (collagen staining) for the aortas and hearts, elastic stain for  
387 the aortas, and Masson's trichrome for the kidneys. Histopathological analysis  
388 assessed qualitatively if fibrosis, cellular hypertrophy, arterial wall thickening  
389 developed in the mouse target organs. Images were acquired with a Leica DMRB  
390 microscope, objective 20X – PL Fluotar ON 0.30, equipped with a Nikon Camera DXM  
391 1200, using the acquisition software NIS Element (Nikon).

392 Measurement of arterial diameter and thickness of arterial wall were performed on  
393 ImageJ.

394 **Tissue collection and pre-treatment for clarification.** Adult mice littermates were  
395 sacrificed by cervical elongation. Kidneys and hearts were collected and fixed on  
396 PBS/PFA 4% overnight at 4°C and 1h at RT with shaking. Fixed organs were washed  
397 in PBS 30 minutes, 3 times at RT with shaking and dehydrated by incubation in baths

398 of increasing concentration of methanol (20%, 40%, 60%, 80% and 100%, 1h each) at  
399 RT with shaking. Organs were incubated 1 more hour at RT with shaking and chilled  
400 at 4°C before incubation in 66%DCM (dichloromethane)/33%Methanol overnight at RT  
401 with shaking. Samples were washed twice in methanol at RT, chilled at 4°C and  
402 bleached in 5%H<sub>2</sub>O<sub>2</sub>-Methanol overnight at 4°C with shaking. Samples were then  
403 rehydrated with methanol series (80%, 60% 40%, 20%, 1 hour each) and washed in  
404 PBS-0,2% TritonX-100 (PTx.2) 2x1h at RT with shaking. Samples were incubated in  
405 permeabilization solution (20% DMSO, 0,2% Glycine, 80% PTx.2) 2 days at 37°C.

406 **Immunostaining on whole kidneys and hearts.** Pre-treated organs were incubated  
407 in blocking solution (84% PTx.2, 0,06% donkey serum, 10% DMSO) 2 days at 37°C  
408 with shaking, incubated in primary antibody diluted in PTwH, 5% DMSO, 3% donkey  
409 serum, during 10 days at 37°C with shaking, washed in PTwH (PBS 0,2% Tween-20,  
410 0,001% heparin) 1 day at RT with shaking, incubated in secondary antibody diluted in  
411 PTwH, 3% donkey serum during 4 days at 37°C with shaking and washed in PTwH for  
412 1 day at RT with shaking.

413 **Kidneys and hearts clarification.** Stained organs were cleared by incubation in 66%  
414 DCM/33% Methanol 3 hours at RT with shaking, washed 2 times 15min in methanol  
415 100% and conserved in DBE (di benzyl ether).

416 **Cell counting on SCG sections.** SCG were collected and prepared as described in  
417 the « tissue collection and cryosection » paragraph and cut in 30µm thick sections.  
418 Number of sympathetic neurons per SCG were estimated by stereology, using the  
419 Stereoinvestigator Software (BMF Bioscience) coupled to a Nikon Eclipse E800  
420 microscope. Interval between slices: 120µm (1 section out of 4). 8 to 10 slices were  
421 counted per SCG. The counting frame of 80µmx80µm and a grid of 150µmx150µm

422 were used. The Coefficient of Error (Gundersen) was inferior or equal to 0.05. The  
423 same parameters were used for all the samples.

424 **Quantitative real time (RT)-qPCR.** SCG or mesenteric arteries were collected,  
425 conserved in RNAlater (Invitrogen), transferred in lysis buffer from NucleoSpin® RNA  
426 XS kit (Macherey-Nagel) and mechanically homogenized in a TissueLyser (Qiagen)  
427 for 2 times 2min, at a frequency of 30s<sup>-1</sup>. Total RNA was extracted using the  
428 NucleoSpin® RNA XS kit and the concentration was determined by using a Nanodrop  
429 2000c spectrophotometer (Thermo Scientific). First-strand cDNA synthesis was  
430 performed by using the Superscript III (Life technologies) in a T100™ Thermal Cycler  
431 (BIO-RAD), using 500ng of total RNA input. For qRT-PCR, 5µL of cDNA (1:10 dilution  
432 for SCG of P3 and adult EphA4<sup>flox</sup> – TH<sup>CRE</sup>; 1:5 dilution for SCG of adult EphA4<sup>-/-</sup> and  
433 mesenteric arteries of adult EphA4<sup>flox</sup> – TH<sup>CRE</sup>) was added to SYBR® Green  
434 Jumpstart™ Taq Ready Mix (Sigma). Each sample was analyzed in duplicate and run  
435 on a MyiQ™ Single Color Real-Time PCR Detection System (BIO-RAD). Mean dCt  
436 values for each target gene were normalized against those of GAPDH and HPRT1  
437 mRNA levels, and corresponding ddCt values were log2-transformed to obtain fold-  
438 change values. All primers used in qPCR experiments are Quantitect© primers  
439 (Qiagen): Mm\_Gapdh\_3\_SG; Mm\_Th\_1\_SG; Mm\_EphA4\_1\_SG. Others primers  
440 were designed by Sigma Aldrich: SMA, sense, GGCATCAATCACTTCAAC, SMA, anti-  
441 sense, CTATCTGGTCACCTGTATG; calponin1, sense,  
442 AAACAAGAGCGGAGATTTGAGC, anti-sense, TGTCGCAGTGTTCCATGCC;  
443 desmin, sense, CGTGACAACCTGATAGAC, anti-sense,  
444 TTCTCTGCTTCTTCTCTTAG; smoothelin, sense, CCTCAGATACCTTGGACTC,  
445 anti-sense, TTGGCAGGATTTTCGTTTC; SM22a, sense,  
446 CAACAAGGGTCCATCCTACGG, anti-sense, ATCTGGGCGGCCTACATCA.

447 **Tissue collection and preparation for Transmission Electronic Microscopy.**

448 Mesenteric arteries were collected and conserved in Glutaraldehyde 2% for 24h.  
449 Samples were fixed in 2% glutaraldehyde in cacodylate buffer 0.1M pH 7.4 for 2h at  
450 4°C, washed and post-fixed with 1% osmium tetroxide in cacodylate buffer for 1h at  
451 4°C. After an extensive wash (3x10 min) with distilled water they were incubated for  
452 2h in 2% uranyl acetate in water. They were then dehydrated in a graded series of  
453 ethanol solutions (2x5min each): 50%, 70%, 80%, 90%, and 100%. Final dehydration  
454 was performed twice in 100% acetone for 20 min. Samples were then progressively  
455 infiltrated with an epoxy resin, Epon 812® (EMS, Souffelweyersheim, France) : 1 night  
456 in 50% resin 50% acetone at 4°C in an airtight container, 2x2h in pure fresh resin at  
457 room temperature. They were embedded in the bottom of capsules (Beems® size 3,  
458 Oxford Instruments, Saclay, France) and the resin was polymerized at 56°C for 48h in  
459 a dry oven. Blocks were cut with an UC7 ultramicrotome (Leica, Leica Microsystems  
460 SAS, Nanterre, France). Semi-thin sections (0.5µm thick) were stained with 1%  
461 toluidine blue in 1% borax. Ultra-thin sections (70nm thick) were recovered either on  
462 copper (conventional morphology) or nickel (immunoelectron microscopy) grids and  
463 contrasted Reynold's lead citrate (Reynolds, ES (1963)). Ultrathin sections were  
464 observed with a Hitachi HT7700 electron microscope (Elexience, Verrière-le-Buisson,  
465 France) operating at 70 kV. Pictures (2048x2048 pixels) were taken with an AMT41B  
466 camera (pixel size: 7.4 µm x7.4 µm). Pictures were processed with the open sources  
467 image processing program ImageJ, NIH, Bethesda, USA, when needed.

468 **Laser doppler experiments.** Assessment of cutaneous blood flow was performed  
469 with a laser Doppler flowmeter (Moor Instruments, Devon, United Kingdom). Adult mice  
470 were anesthetized by inhalation of a mix of oxygen and isoflurane (2% in induction and  
471 maintenance, Aerrane, BAXTER, France). Mice were then placed on a heating

472 platform and kept unstressed to reach a body temperature of 37.5°C (monitored by a  
473 rectal temperature sensor). Bilateral hind paw skin blood perfusion was assessed. The  
474 heating platform was then switched off to let the body temperature of the mice  
475 decrease. Each 0.5°C of temperature decreasing, bilateral hind paw skin blood  
476 perfusion was assessed. Results are expressed as a percentage of baseline. Same  
477 experiment was performed a second time on each animal after the intra-peritoneal  
478 injection of Prazosin (Sigma, 1mg/kg).

479 **Ultrasound investigation.** Adult mice were anesthetized with a mix of oxygen and  
480 isoflurane (4% induction, 1.5-2% maintenance). All acquisitions were done using a  
481 40Hz MS-550S MicroScan™ array transducer (Visualsonics, Inc) connected to  
482 Vevo2100 FUJIFILM Visualsonics, Inc (VisualSonics, Toronto, Ontario, Canada).  
483 Parasternal Long Axis (PSLA), Short Axis (SAX) and arterial views were acquired in  
484 B-mode to assess anatomical aspect of the heart and different arteries. SAX and  
485 arterial views were also acquired in M-mode to measure directly on the Vevo2100 the  
486 thickness of the left ventricular walls, the diameter and the thickness of carotids and  
487 renal arteries. Ejection Fraction (EF) was calculated using the formula  
488  $100 \times \left( \frac{LV\ Vol;d - LV\ Vol;s}{LV\ Vol;d} \right)$  where LV Vol;d stands for “Left Ventricle Volume in diastole”  
489 and LV Vol;s stands for Left Ventricle Volume in systole. LV Vol;d was calculated using  
490 the formula  $\left( \frac{7.0}{2.4 + LVID;d} \right) \times LVID;d^3$  where LVID;d stands for “Left Ventricular Internal  
491 Diameter in diastole” and LVID;s stands for “Left Ventricular Internal Diameter in  
492 systole”. LVID;d and LVID;s were measured on M-mode acquisitions. Fractional  
493 Shortening (FS) was calculated using the formula  $100 \times \left( \frac{LVID;d - LVID;s}{LVID;d} \right)$ . Weight of the  
494 Left ventricle was calculated on the basis of M-mode measurements, using the formula:  
495  $(1.053 \times ((LVID;d + LVPW;d + IVS;d)^3 - LVID;d^3)) \times 0.8$  where LVPW;d is the thickness

496 of the anterior wall of the left ventricle in diastole and IVS;  $d$  is the thickness of the inter-  
497 ventricular septum in diastole. Acquisitions in pulse-waved doppler (PW-mode) of  
498 carotids and renal arteries were also done to assess blood flow in these arteries. All  
499 measurements were done between respiratory movements to avoid bias. Pulsatility  
500 index of carotids and renal arteries were calculated using the formula  
501  $\frac{\text{artery PSV} - (\text{artery EDV})}{\text{artery VTI, Mean velocity}}$  where PSV stands for “Peak Systolic Velocity”, EDV stands for  
502 “End Diastolic Velocity” and VTI stands for “Velocity Time Integral”. PSV, EDV and VTI  
503 were measured on PW-mode acquisitions. Resistivity index of carotids and renal  
504 arteries were calculated using the formula  $\frac{\text{artery PSV} - \text{artery EDV}}{\text{artery PSV}}$ .

505 **Pharmacological profile of isolated mesenteric arteries.** Segments of mesenteric  
506 arteries were mounted in a wire-myograph (Danish Myo Technology, Denmark) as  
507 previously described (36) . Electrical field stimulation (EFS) was applied by means of  
508 two platinum electrodes placed on either side of the rings and connected to a stimulator  
509 (S-900 Stimulator Cornerstone by Dagan). Stimulation was held at 0.02–32 Hz  
510 frequency with amplitude of 12 V and pulse duration of 1 ms delivered as 1 min trains  
511 (frequency 0.2 Hz, 0.5 Hz, 1Hz, 2Hz, 4Hz, 8Hz, 16Hz and 32Hz) with 10 minutes  
512 between 2 stimulations. In other arterial segments, cumulative concentration-response  
513 curves (CRCs) to phenylephrine (1 nmol/L to 30  $\mu\text{mol/L}$ ) was performed. CRCs to  
514 acetylcholine (ACh, 1 nmol/L to 10  $\mu\text{mol/L}$ ) or sodium nitroprusside (SNP, 0.1 nmol/L  
515 to 30  $\mu\text{mol/L}$ ) was obtained after precontraction with phenylephrine (1  $\mu\text{mol/L}$ ).

516 **Surgery.** Mice were anesthetized initially with 5% isoflurane in an oxygen stream and  
517 maintained on 2-3% isoflurane. To reduce pain, mice received 2 injections of  
518 meloxicam (2mg/kg per injection) at 24h interval. Mice were kept on a heating pad  
519 throughout implantation of the BP telemeter (TA11PA-C10, Data Science International,



520 St. Paul, MN). The catheter was inserted into the left common artery. This method has  
521 been previously described (37). The telemetric transmitter probe was positioned  
522 subcutaneously on the right flank. After the mice had recovered from the anesthesia in  
523 a warm (37°C) box, they were housed in individual cages placed on top of the telemetric  
524 receivers in a light-dark cycled recording room.

525 **Blood pressure measurements.** Study of blood pressure by telemetry was performed  
526 on separate, dedicated sets of mice to avoid interference by other measurements.  
527 Blood pressure, heart rate (HR), and locomotor activity were monitored 48hours  
528 following the surgical implantation of telemetric transmitter, and the 8th and 9th day  
529 after the surgery by telemetric recording in conscious, freely moving animals as  
530 previously described (37, 38), every hour during 2 minutes. Radiotelemetry probes  
531 (model TA11PA-C10; Data Science International, St. Paul, MN) were implanted in age-  
532 matched adult mice (2 to 4 months old). Data were analyzed using the Dataquest ART  
533 analysis software. Introduction of an unknown male mate was used as an acute  
534 stressful stimulus. Activity, blood pressure and heart rate were continuously recorded  
535 during this stressful stimulus.

536 **Serum sampling.** 200µL of blood were sampled per mice twice at 24h interval at facial  
537 vein, using specifically designed lancets (Bioseb). Blood samples were let at RT 30min  
538 to coagulate with heparin 10% and centrifugated 10min at 4°C 2000g. Serum were  
539 sampled and kept at -80°C.

540 **ELISA.** Serum levels of renin (ThermoScientific), angiotensin-II (EnzoLife Science)  
541 and aldosterone (EnzoLife Science) were assessed by ELISA dosages. Serums were  
542 gently thawed on ice and diluted at 1/10 (renin and angiotensin) or 1/20 (aldosterone)  
543 in respective assay buffers. ELISA dosages were performed according to

544 manufacturer's instructions. Regression curves were performed and final  
545 concentrations calculated using GraphPad Prism 6 software.

546 **Statistics.** For all statistical analyses, GraphPad Prism 6 software was used. All  
547 replicate numbers (number of mice analyzed, unless otherwise indicated) are indicated  
548 in the figures. Only male mice were included in analyses to avoid impact of sexual  
549 cycle on our studies. No statistical methods were used to pre-determine sample size.  
550 When possible, all analysis were done blind to genotype and/or treatment groups. Error  
551 bars represent SEM in all figures. *P* values of less than 0.05 were considered  
552 significant in all experiments. All tests performed were two-tailed. For comparison  
553 between two groups, a non-parametric Mann-Whitney t-test was used. For assessment  
554 between more than two groups, one-way ANOVA with multiple comparisons (Dunn's  
555 test) was used and for assessment between two independent variables, two-way  
556 ANOVA with multiple comparisons (Bonferroni's test) was used. In telemetry studies  
557 (acute stress), two-way ANOVA was used to assess differences between genotypes.

558 **Study approval.** Animal experiments were performed according to ethical regulations  
559 and approved protocols by the CIRB ethical committee (n°005) and the CEF ethical  
560 committee (n°59) under the Apafis agreement number 6951.

561 **Author contributions**

562 I.B. and E.S. conceived the study. S.M., E.S., J.V. and E.V. conducted experiments.

563 E.S., S.M., E.V., J.V., V. M., and I.B. analyzed data. I.B. wrote the manuscript. All

564 authors reviewed and edited the manuscript. E.S. and S.M. have contributed equally

565 to the work and share co-first authorship. They are listed on this order as E.S. initiated

566 the study and generated the first results whereas S.M. joined the study later. E.S. and

567 S.M. agree on this assignment of authorships.

568 **Acknowledgements**

569 We would like to thank Guy Malkinson for critical reading of the manuscript, and Bing-  
570 Cheng Wang for providing EphrinAs TKO mice tissues. This work was supported by  
571 grants from Inserm, Agence Nationale de la Recherche (ANR NIRVANA) and  
572 Fondation pour la Recherche Médicale (FRM). We gratefully acknowledge support by  
573 Ligue contre le Cancer and MemoLife Labex (ST), FRM (ES).

574 Address correspondence to : Isabelle Brunet, Center for Interdisciplinary Research in  
575 Biology (CIRB), College de France, CNRS, INSERM, Université PSL, 75005 Paris,  
576 France. Phone: + 33 144271693 ; Email: [isabelle.brunet@college-de-france.fr](mailto:isabelle.brunet@college-de-france.fr)

577 **References**

- 578 1. Rubin E. Development of the rat superior cervical ganglion: ganglion cell  
579 maturation. *J. Neurosci.* 1985;5(3):673–684.
- 580 2. Glebova NO, Ginty DD. Growth and survival signals controlling sympathetic  
581 nervous system development. *Annu. Rev. Neurosci.* 2005;28(1):191–222.
- 582 3. Eichmann A, Brunet I. Arterial innervation in development and disease. *Sci.*  
583 *Transl. Med.* 2014;6(252):3–6.
- 584 4. Simonnet É, Brunet I. The functions of arterial sympathetic innervation: from  
585 development to pathology. *médecine/sciences* 2019;35(8–9):643–650.
- 586 5. Mukoyama Y, et al. Sensory Nerves Determine the Pattern of Arterial  
587 Differentiation and Blood Vessel Branching in the Skin. *Cell* 2002;109(6):693–  
588 705.
- 589 6. Brunet I, et al. Netrin-1 controls sympathetic arterial innervation. *J. Clin. Invest.*  
590 2014;124(7):3230–3240.
- 591 7. Burnstock G. Autonomic Neurotransmission: 60 Years Since Sir Henry Dale.  
592 *Annu. Rev. Pharmacol. Toxicol.* 2009;49(1):1–30.
- 593 8. Flatmark. Catecholamine biosynthesis and physiological regulation in  
594 neuroendocrine cells. *Acta Physiol. Scand.* 2000;168(1):1–17.
- 595 9. Storkebaum E, et al. Impaired Autonomic Regulation of Resistance Arteries in  
596 Mice With Low Vascular Endothelial Growth Factor or Upon Vascular Endothelial  
597 Growth Factor Trap Delivery. *Circulation* 2010;122(3):273–281.
- 598 10. Purves D, Njå A. Effect of nerve growth factor on synaptic depression after  
599 axotomy. *Nature* 1976;260(5551):535–536.
- 600 11. White IA. Cardiac Sympathetic Denervation in the Failing Heart. *Circ. Res.*  
601 2016;118(8):1189–1191.

- 602 12. Mukouyama Y. Vessel-dependent recruitment of sympathetic axons: looking for  
603 innervation in all the right places. *J. Clin. Invest.* 2014;124(7):2855–2857.
- 604 13. Versaci F, et al. Renal arteries denervation with second generation systems: a  
605 remedy for resistant hypertension?. *Eur. Hear. J. Suppl.*  
606 2020;22(Supplement\_L):L160–L165.
- 607 14. Vavřínová A, et al. Sympathectomy-induced blood pressure reduction in adult  
608 normotensive and hypertensive rats is counteracted by enhanced cardiovascular  
609 sensitivity to vasoconstrictors. *Hypertens. Res.* 2019;42(12):1872–1882.
- 610 15. Schobel HP, et al. Preeclampsia — A State of Sympathetic Overactivity. *N. Engl.*  
611 *J. Med.* 1996;335(20):1480–1485.
- 612 16. Moss A, et al. Ephrin-A4 inhibits sensory neurite outgrowth and is regulated by  
613 neonatal skin wounding. *Eur. J. Neurosci.* 2005;22(10):2413–2421.
- 614 17. Dines M, Lamprecht R. EphrinA4 mimetic peptide targeted to EphA binding site  
615 impairs the formation of long-term fear memory in lateral amygdala. *Transl.*  
616 *Psychiatry* 2014;4(9):e450–e450.
- 617 18. Kullander K. Ephrin-B3 is the midline barrier that prevents corticospinal tract  
618 axons from recrossing, allowing for unilateral motor control. *Genes Dev.*  
619 2001;15(7):877–888.
- 620 19. Ye X, et al. A subtle network mediating axon guidance: Intrinsic dynamic  
621 structure of growth cone, attractive and repulsive molecular cues, and the  
622 intermediate role of signaling pathways. *Neural Plast.* 2019;2019.  
623 doi:10.1155/2019/1719829
- 624 20. Yue X, Son AI, Zhou R. Growth Cone Collapse Assay. *methods Mol. Biol.*  
625 2013;1018:221–227.
- 626 21. Miao H, et al. EphA2 promotes infiltrative invasion of glioma stem cells in vivo

- 627 through cross-talk with Akt and regulates stem cell properties. *Oncogene*  
628 2015;34(5):558–567.
- 629 22. Zhou Q-Y, Quaife CJ, Palmiter RD. Targeted disruption of the tyrosine  
630 hydroxylase gene reveals that catecholamines are required for mouse fetal  
631 development. *Nature* 1995;374(6523):640–643.
- 632 23. Herrmann JE, et al. Generation of an EphA4 conditional allele in mice. *genesis*  
633 2009;48(2):1–5.
- 634 24. Savitt JM. Bcl-x Is Required for Proper Development of the Mouse Substantia  
635 Nigra. *J. Neurosci.* 2005;25(29):6721–6728.
- 636 25. Serafini T, et al. Netrin-1 is required for commissural axon guidance in the  
637 developing vertebrate nervous system. *Cell* 1996;87(6):1001–1014.
- 638 26. Sällström J, et al. Impaired EphA4 signaling leads to congenital hydronephrosis,  
639 renal injury, and hypertension. *Am. J. Physiol. - Ren. Physiol.* 2013;305(1):71–  
640 79.
- 641 27. Sata Y, et al. Role of the Sympathetic Nervous System and Its Modulation in  
642 Renal Hypertension. *Front. Med.* 2018;5(MAR). doi:10.3389/fmed.2018.00082
- 643 28. Mahfoud F, et al. Changes in Plasma Renin Activity After Renal Artery  
644 Sympathetic Denervation. *J. Am. Coll. Cardiol.* 2021;77(23):2909–2919.
- 645 29. Wang H, et al. Role of the nervous system in cancers: a review. *Cell Death*  
646 *Discov.* 2021;7(1):76.
- 647 30. Miyato H, et al. Loss of Sympathetic Nerve Fibers Around Intratumoral Arterioles  
648 Reflects Malignant Potential of Gastric Cancer. *Ann. Surg. Oncol.*  
649 2011;18(8):2281–2288.
- 650 31. Imnadze G, et al. Anatomic Patterns of Renal Arterial Sympathetic Innervation:  
651 New Aspects for Renal Denervation. *J. Interv. Cardiol.* 2016;29(6):594–600.

- 652 32. Ogita H, et al. EphA4-Mediated Rho Activation via Vsm-RhoGEF Expressed  
653 Specifically in Vascular Smooth Muscle Cells. *Circ. Res.* 2003;93(1):23–31.
- 654 33. Croteau L-P, Kao T-J, Kania A. Ephrin-A5 potentiates netrin-1 axon guidance by  
655 enhancing Neogenin availability. *Sci. Rep.* 2019;9(1):12009.
- 656 34. Shamah SM, et al. EphA Receptors Regulate Growth Cone Dynamics through  
657 the Novel Guanine Nucleotide Exchange Factor Ephexin. *Cell* 2001;105(2):233–  
658 244.
- 659 35. Bajanca F, et al. Integrins in the mouse myotome: Developmental changes and  
660 differences between the epaxial and hypaxial lineage. *Dev. Dyn.*  
661 2004;231(2):402–415.
- 662 36. Mulvany MJ, Halpern W. Contractile properties of small arterial resistance  
663 vessels in spontaneously hypertensive and normotensive rats.. *Circ. Res.*  
664 1977;41(1):19–26.
- 665 37. Butz GM, Davisson RL. Long-term telemetric measurement of cardiovascular  
666 parameters in awake mice: a physiological genomics tool. *Physiol. Genomics*  
667 2001;5(2):89–97.
- 668 38. Griol-Charhbili V, et al. Tissue kallikrein deficiency and renovascular  
669 hypertension in the mouse. *Am. J. Physiol. Integr. Comp. Physiol.*  
670 2009;296(5):R1385–R1391.



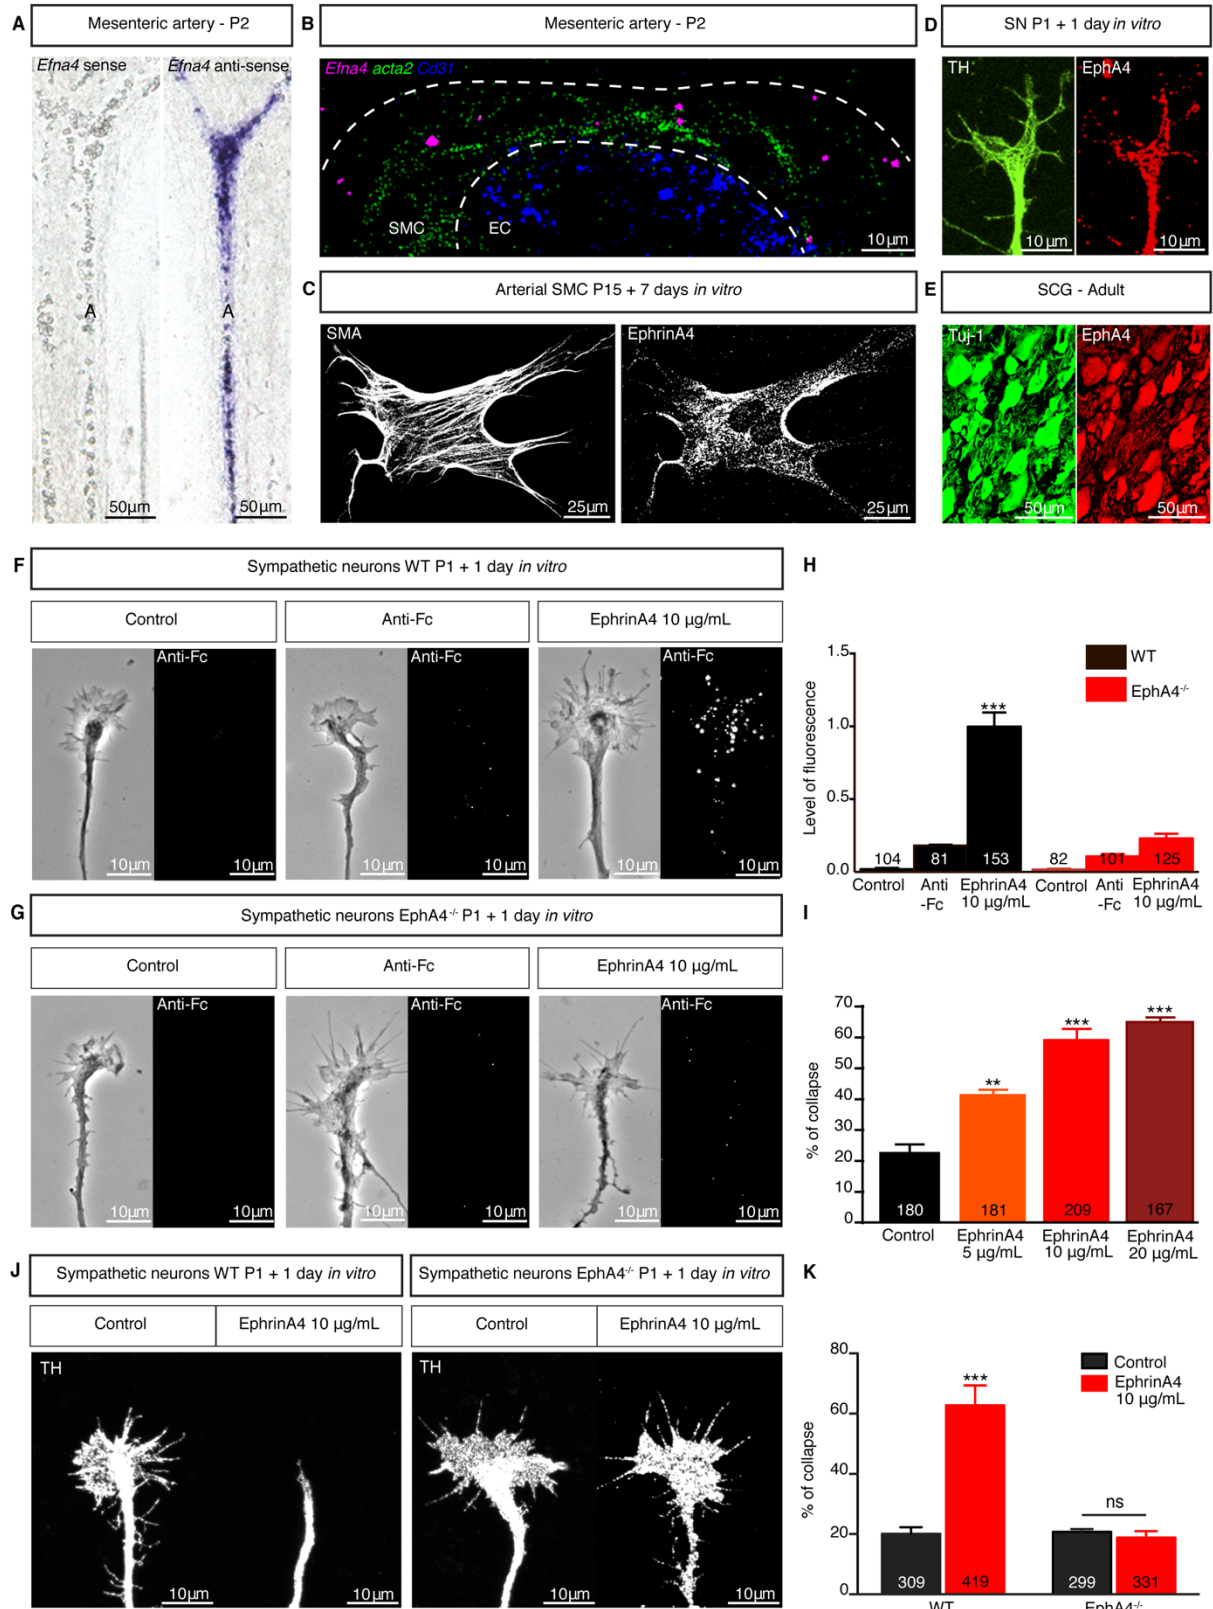

671 **Figure 1. EphrinA4-EphA4 are expressed upon sympathetic arterial innervation**  
672 **and mediate axonal repulsion.**

673 **(A)** *In situ* hybridization (ISH) of *Efna4* mRNA in whole-mount mesenteric artery (A)  
674 from WT mice at P2. Control *Efna4* sense probe (left) and anti-sense probe (right)  
675 ensured staining specificity. **(B)** Fluorescent ISH of *Efna4* (magenta), *acta2* (green)  
676 and *cd31* (blue) in transverse sections of mesenteric arteries from WT mice (P2). Dotted  
677 lines delineate smooth muscle cells (SMC) layer and endothelial cells (EC). **(C-E)**  
678 Immunofluorescent staining of SMA (smooth muscle actin, left) and EphrinA4 (right)  
679 on an arterial SMC (P15 WT mouse mesentery) cultured *in vitro* (7 days) **(C)**; of TH  
680 (Tyrosine hydroxylase, green) and EphA4 (red) on sympathetic neurons (SN) from  
681 Superior Cervical Ganglia (SCG) of a WT mouse (P1) after 1 day *in vitro* **(D)**; of Tuj-1  
682 (green) and EphA4 (red) in a transverse section of adult SCG from WT mice **(E)**. **(F**  
683 **and G)** Binding assay on SN from WT **(F)** and EphA4<sup>-/-</sup> mice **(G)** collected at P1, and  
684 cultured *in vitro* during 1 day. SN were stimulated with either control media (left), CY3-  
685 anti-Fc (middle) or clustered EphrinA4-Fc-CY3 (10 µg/mL, right). **(H)** Quantification of  
686 fluorescence levels of CY3-Anti-Fc signal on those SN. **(I)** Quantification of axonal  
687 collapse percentage of WT SN stimulated with EphrinA4 (from 0 to 20 µg/mL). **(J)**  
688 Collapse assay of SN (expressing TH) from WT and EphA4<sup>-/-</sup> mice at P1, cultured *in*  
689 *vitro* during 1 day, stimulated with control media (left) or clustered-EphrinA4 (10 µg/mL,  
690 right). **(K)** Quantification of the collapse assay.

691 \*\* p<0.01 \*\*\*p<0.001

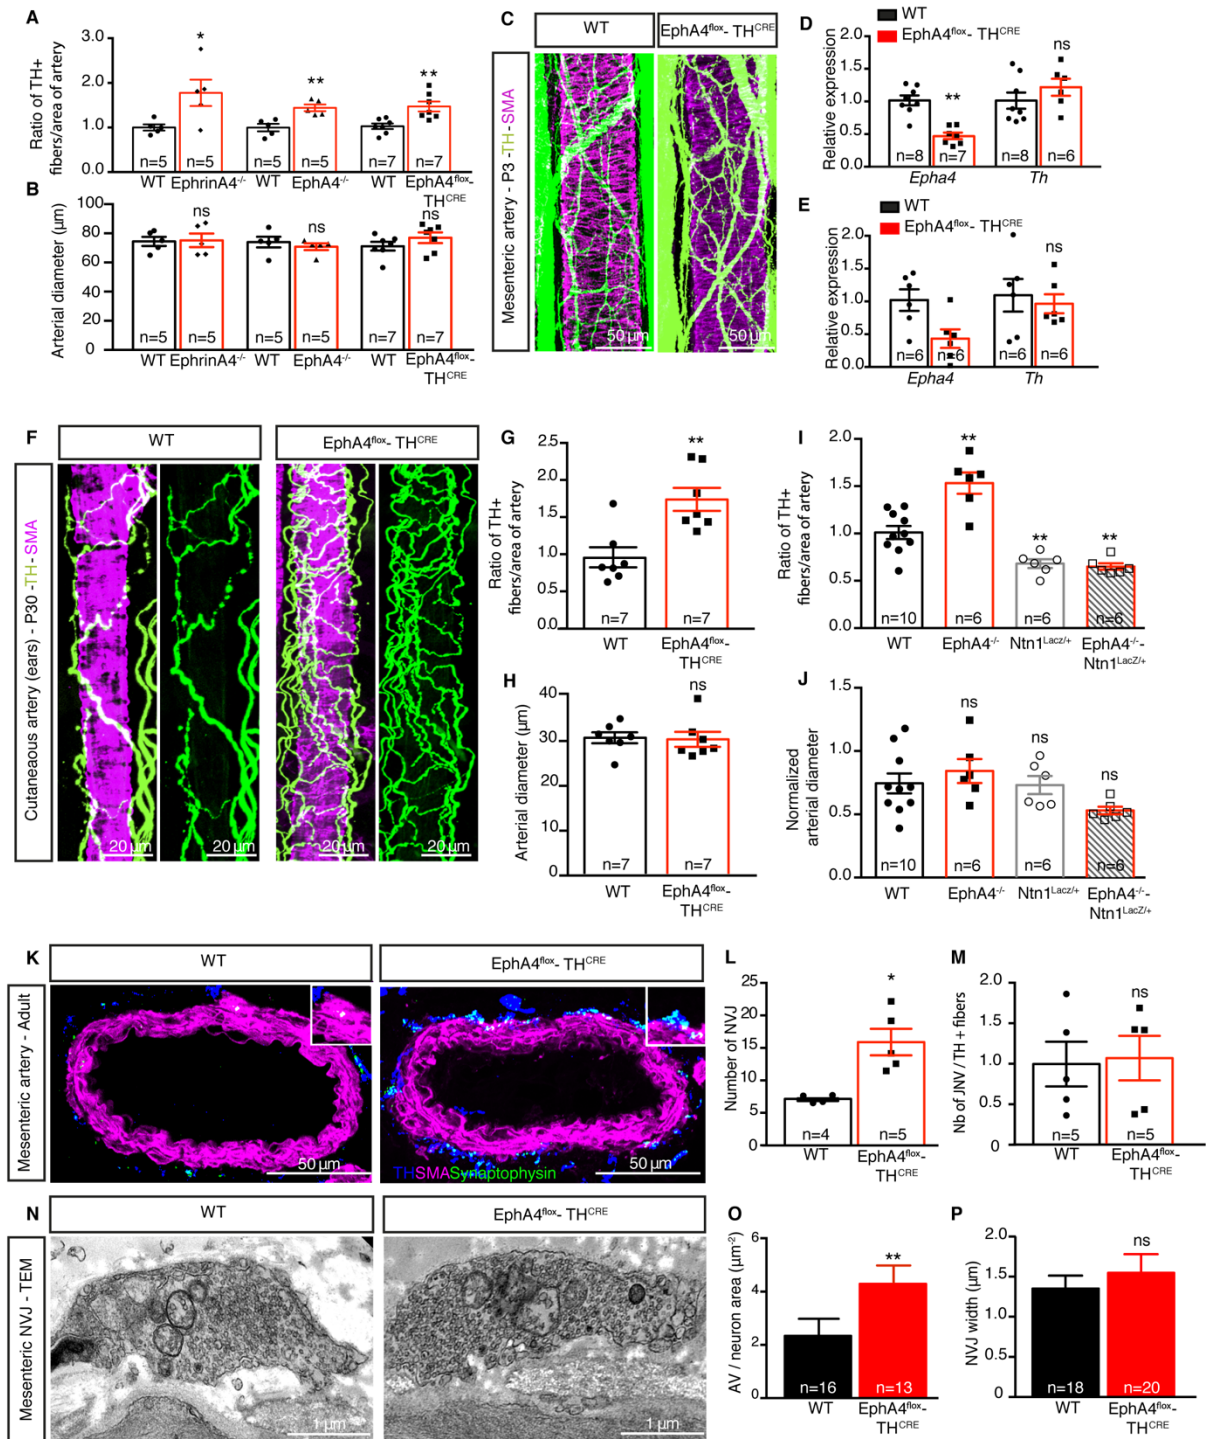

692 **Figure 2. Loss of EphrinA4-EphA4 signaling *in vivo* leads to enhanced**  
693 **sympathetic arterial innervation and NVJs, compatible with a loss of repulsion.**

694 **(A and B)** Quantification of percentage of TH<sup>+</sup> nerve fibers covering mesenteric  
695 arteries **(A)** and arterial diameter **(B)** from WT, EphrinA4<sup>-/-</sup>, EphA4<sup>-/-</sup> and EphA4<sup>flox-</sup>  
696 TH<sup>CRE</sup> mice (P3). **(C)** Whole-mount immunofluorescent staining of TH (green) and SMA  
697 (magenta) on mesenteric arteries from WT (left) and EphA4<sup>flox-</sup>TH<sup>CRE</sup> mice (P3). **(D**  
698 **and E)** Relative normalized expression of *Epha4* and *Th* mRNA in SCG from WT and  
699 EphA4<sup>flox-</sup>TH<sup>CRE</sup> at P3 **(D)**, and from adults **(E)**. **(F)** Immunofluorescent staining of TH  
700 (Sympathetic nerves, green) and SMA (SMC, magenta) on cutaneous arteries (ears)  
701 from WT (left) and EphA4<sup>flox-</sup>TH<sup>CRE</sup> (right) mice (P30). **(G and H)** Quantification of the  
702 percentage of TH<sup>+</sup> nerve fibers covering cutaneous arteries **(G)** and quantification of  
703 the arterial diameter **(H)** from WT and EphA4<sup>flox-</sup>TH<sup>CRE</sup> mice (P30). **(I and J)**  
704 Quantification of TH<sup>+</sup> nerve fibers percentage covering cutaneous arteries from WT,  
705 EphA4<sup>-/-</sup>, Ntn1<sup>LacZ/+</sup> and EphA4<sup>-/-</sup>-Ntn1<sup>LacZ/+</sup> mice (P30) **(I)** and quantification of the  
706 arterial diameter normalized to WT animals for each genotype **(J)**. **(K)**  
707 Immunofluorescent staining of TH (blue), SMA (magenta) and synaptophysin (green)  
708 on mesenteric artery sections from adult WT and EphA4<sup>flox-</sup>TH<sup>CRE</sup> mice. Boxes show  
709 close-up of neurovascular junctions (NVJ). **(L)** Quantification of the number of NVJ on  
710 mesenteric arteries from adult WT and EphA4<sup>flox-</sup>TH<sup>CRE</sup> mice. **(M)** Ratio between  
711 number of NVJ and TH<sup>+</sup> fibers covering the mesenteric arteries for each genotype,  
712 normalized to WT value. **(N)** Transmission electronic microscopy images of NVJ in  
713 mesenteric arteries from adult WT and EphA4<sup>flox-</sup>TH<sup>CRE</sup> mice. **(O)** Quantification of the  
714 number of Adrenergic Vesicles (AV) divided by NVJ area. **(P)** Quantification of NVJ  
715 width on mesenteric arteries from adult WT and EphA4<sup>flox-</sup>TH<sup>CRE</sup> mice.

716 ns: not significant, \* p<0.05; \*\* p<0.01 ;\*\*\*p<0.001.

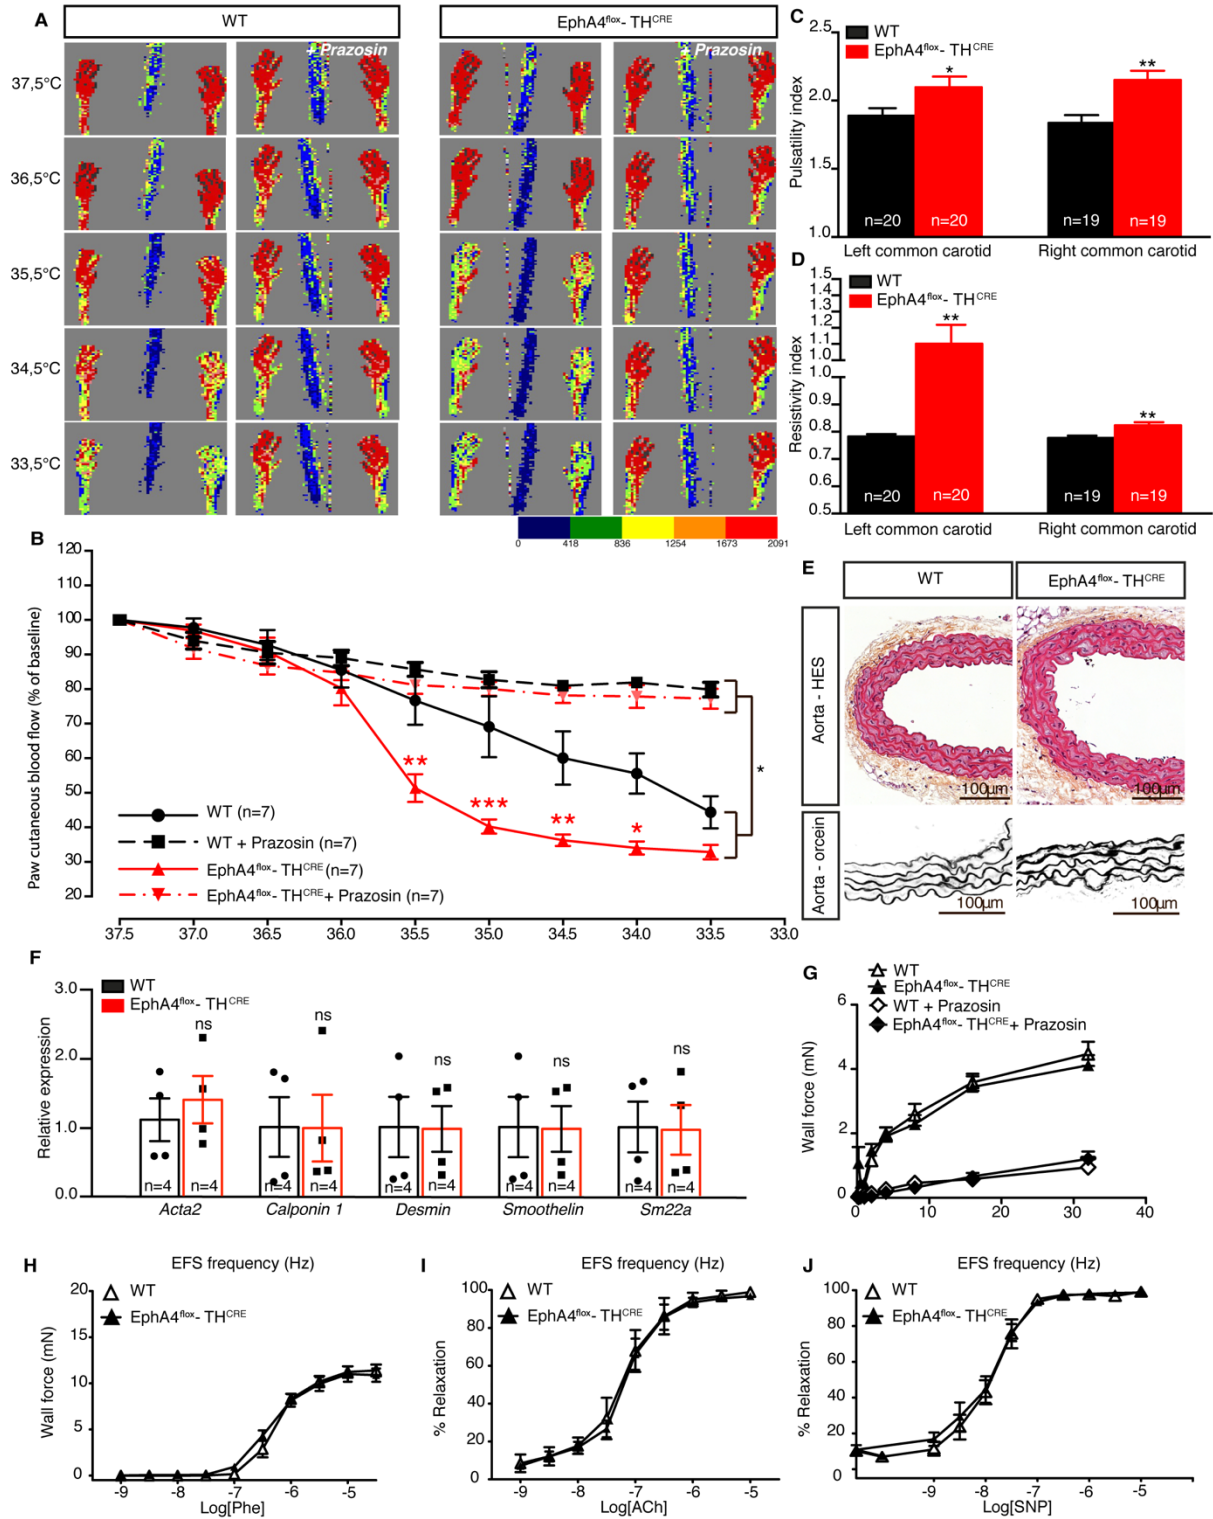

717 **Figure 3. Hyper-innervated arteries show an enhanced vasoconstriction and**  
718 **resistivity but no anatomical, molecular and physiological change.**

719 **(A)** Laser Doppler recordings of hind paw cutaneous blood flow of adult WT and  
720 EphA4<sup>flox</sup>-TH<sup>CRE</sup> mice under anesthesia and monitored for body core temperature,  
721 without (left) or with injection of prazosin (1mg/kg Intra-peritoneal, right). Red color  
722 indicates highest blood flow. (n=7 mice per group). **(B)** Quantification of  
723 vasoconstriction in EphA4<sup>flox</sup>-TH<sup>CRE</sup> mice and WT littermates. For each animal, the  
724 measurement of the foot blood flow at 37,5°C was considered as 100%, and the data  
725 from other temperatures were expressed as the percentages of the measurement at  
726 37,5°C (% of baseline). **(C and D)** Pulsatility **(C)** and resistivity **(D)** indexes of the left  
727 and right common carotids of adult WT and EphA4<sup>flox</sup>-TH<sup>CRE</sup> mice recorded by  
728 ultrasound. **(E)** HES (hematoxylin eosin sirius red, top) and orcein (bottom) coloration  
729 of transverse sections of aortas from adult WT and EphA4<sup>flox</sup>-TH<sup>CRE</sup> mice. **(F)**  
730 Normalized relative expression of *Acta2*, *Calponin1*, *Desmin*, *Smoothelin*, *Sm22a*  
731 mRNA by aortas from adult WT mice and EphA4<sup>flox</sup>-TH<sup>CRE</sup> littermates. **(G-J)** Isolated  
732 rings of mesenteric arteries from adult WT and EphA4<sup>flox</sup>-TH<sup>CRE</sup> mice were mounted in  
733 a wire-myograph and submitted to electrical field stimulation (EFS, **G**). In other arterial  
734 rings, contraction induced by phenylephrine (Phe, 1 nmol/L to 30 µmol/L, **H**) and  
735 relaxation induced by acetylcholine (ACh, 1 nmol/L to 10 µmol/L, **I**) or sodium  
736 nitroprusside (SNP, 0.1 nmol/L to 30 µmol/L, **J**) were measured.

737 ns : not significant; \*p<0,05; \*\*p<0.01

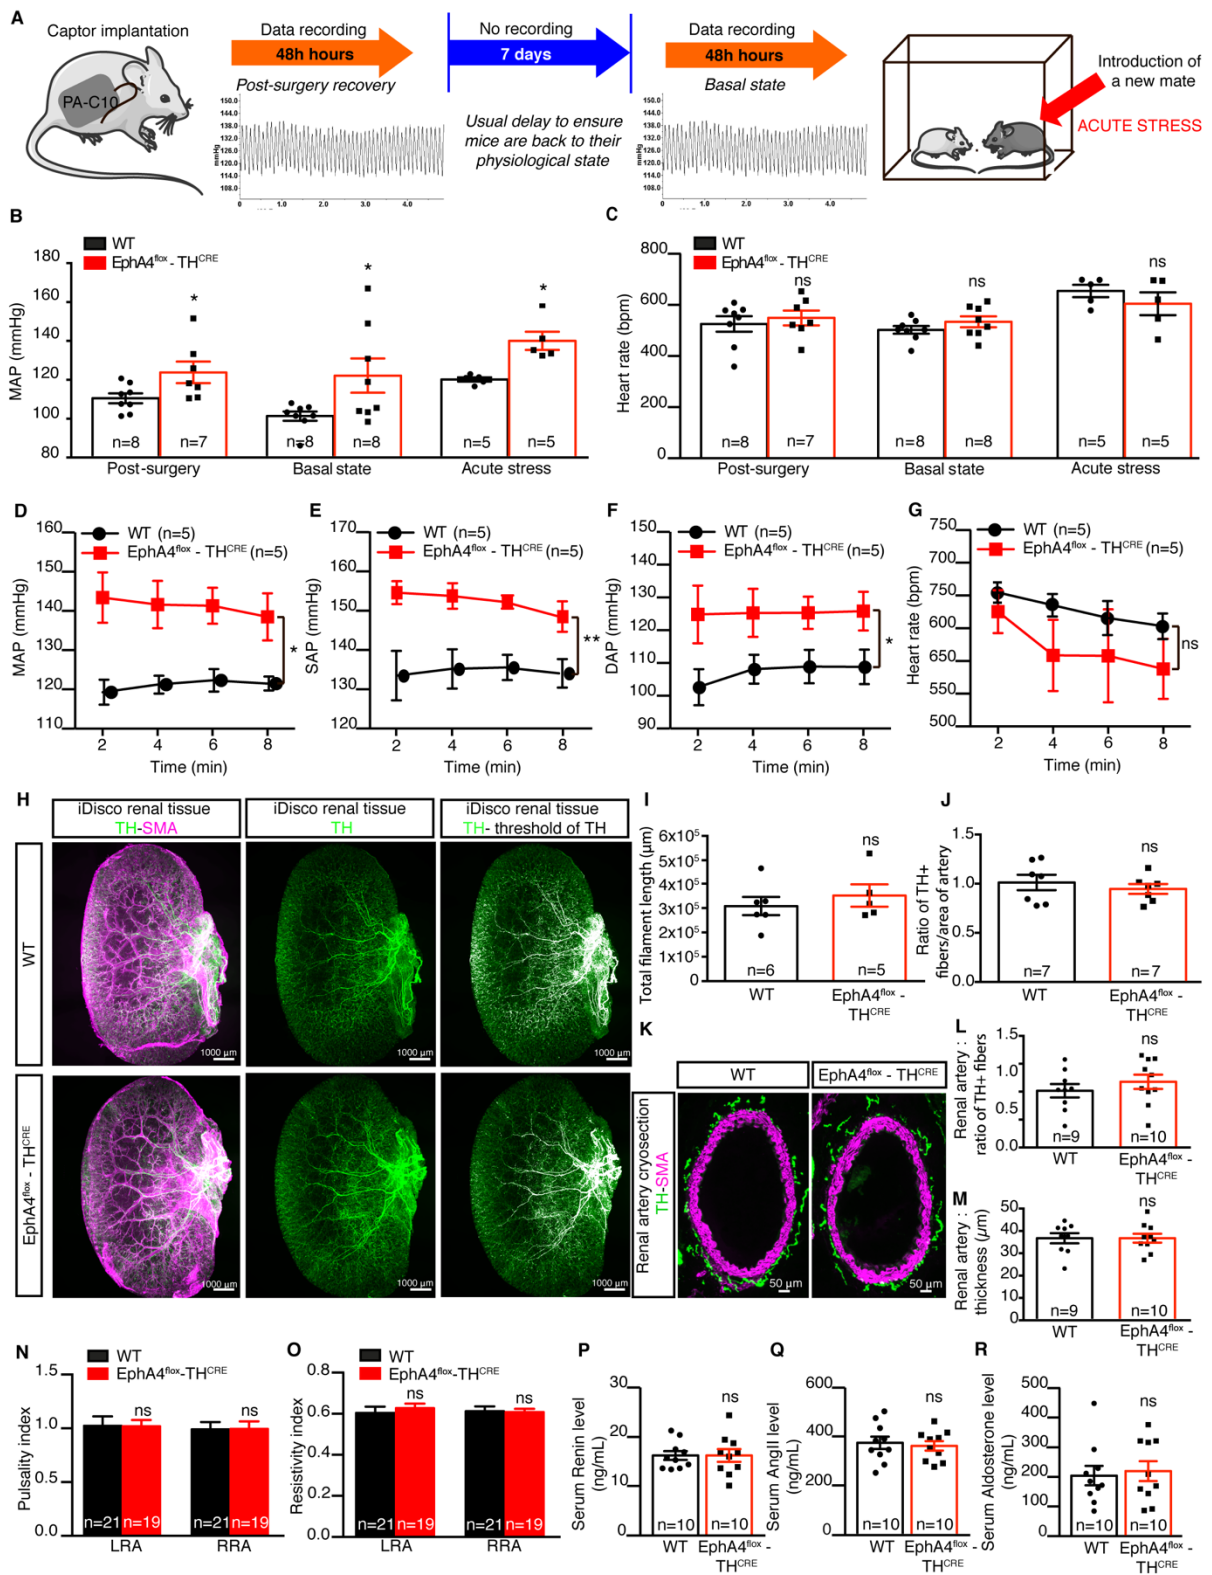

738 **Figure 4. Sympathetic peripheral arterial resistance induces elevated arterial**  
739 **blood pressure independently from heart rate and renal regulations.**

740 **(A)** Experimental design of telemetric recordings: after captor implantation, data were  
741 recorded during 48 hours post-surgery, followed by 7 days without recording, basal  
742 state recording (48 h) and after an acute stress (introduction of an unknown animal  
743 within the cage). **(B and C)** Mean arterial pressure (MAP) **(B)** and heart rate **(C)** during  
744 post-surgery phase, basal state and acute stress phase of adult WT and EphA4<sup>flox-</sup>  
745 TH<sup>CRE</sup> mice. **(D-G)** MAP **(D)**, systolic arterial pressure (SAP, **E**), diastolic arterial  
746 pressure (DAP, **F**) and heart rate **(G)** (measurements every 2 minutes during 8  
747 minutes) of adult WT and EphA4<sup>flox-</sup>TH<sup>CRE</sup> mice during acute stress phase. **(H)** Cleared  
748 kidneys (iDisco method) stained for TH (sympathetic nerve fibers, green) and SMC  
749 (SMA, magenta) from adult WT and EphA4<sup>flox-</sup>TH<sup>CRE</sup> mice. The sympathetic nervous  
750 network was quantified using TH signal fluorescence intensity (right panels). Large  
751 bundles of sympathetic axons appear in white. **(I)** Quantification of the total filament  
752 length representing the sympathetic nervous network of kidneys from adult WT and  
753 EphA4<sup>flox-</sup>TH<sup>CRE</sup> mice. **(J)** Quantification of TH+ nerve fibers covering penetrating renal  
754 arteries of adult WT and EphA4<sup>flox-</sup>TH<sup>CRE</sup> mice. **(K)** Immunofluorescent staining of TH  
755 (green) and SMA (magenta) on sections of renal main arteries of adult WT and  
756 EphA4<sup>flox-</sup>TH<sup>CRE</sup> mice. **(L and M)** Quantification of the percentage of TH+ nerve fibers  
757 covering renal arteries **(L)** and of arterial wall thickness **(M)** from adult WT and  
758 EphA4<sup>flox-</sup>TH<sup>CRE</sup> mice. **(N and O)** Pulsatility **(N)** and resistivity **(O)** indexes of left and  
759 right renal arteries from adult WT and EphA4<sup>flox-</sup>TH<sup>CRE</sup> mice. **(P-R)** Serum levels of  
760 renin **(P)**, angiotensin II **(Q)** and aldosterone **(R)** from adult WT and EphA4<sup>flox-</sup>TH<sup>CRE</sup>  
761 mice.

762 ns : not significant; \*p<0,05.



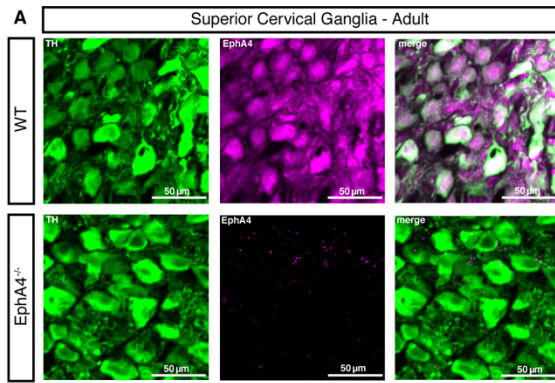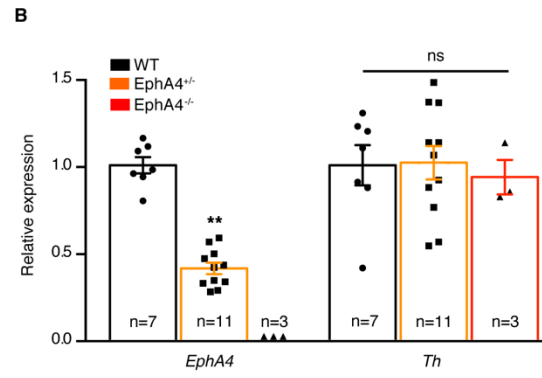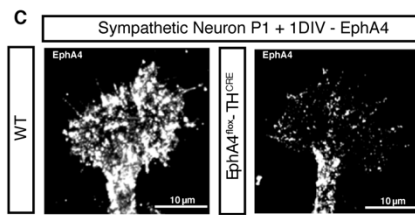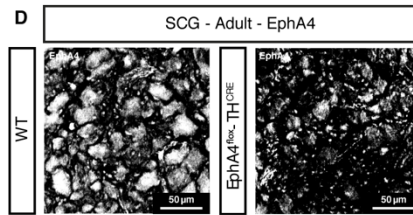

763 **Supplemental Figure 1. Neuronal loss of EphA4 expression in full knock-out and**  
764 **TH-specific mice.**

765 **(A)** Immunofluorescent staining on transverse section of SCG from adult WT and  
766 EphA4<sup>-/-</sup> littermates. Neurons from WT express TH (green) and EphA4 (magenta),  
767 whereas EphA4 staining is lost in EphA4<sup>-/-</sup>. **(B)** Relative normalized expression of *Th*  
768 and *Epha4* mRNA in SCG from adult WT and EphA4<sup>flox</sup>-TH<sup>CRE</sup>. **(C)** Immunofluorescent  
769 staining of sympathetic axons and growth cone from WT and EphA4<sup>flox</sup>-TH<sup>CRE</sup> P1 mice,  
770 cultured 1 day *in vitro*. Neuronal EphA4 expression appears in white. **(D)**  
771 Immunofluorescent staining of a transverse section of SCG from adult WT and  
772 EphA4<sup>flox</sup>-TH<sup>CRE</sup> mice. EphA4 expression appears in white.

773 \*\* p<0.01.

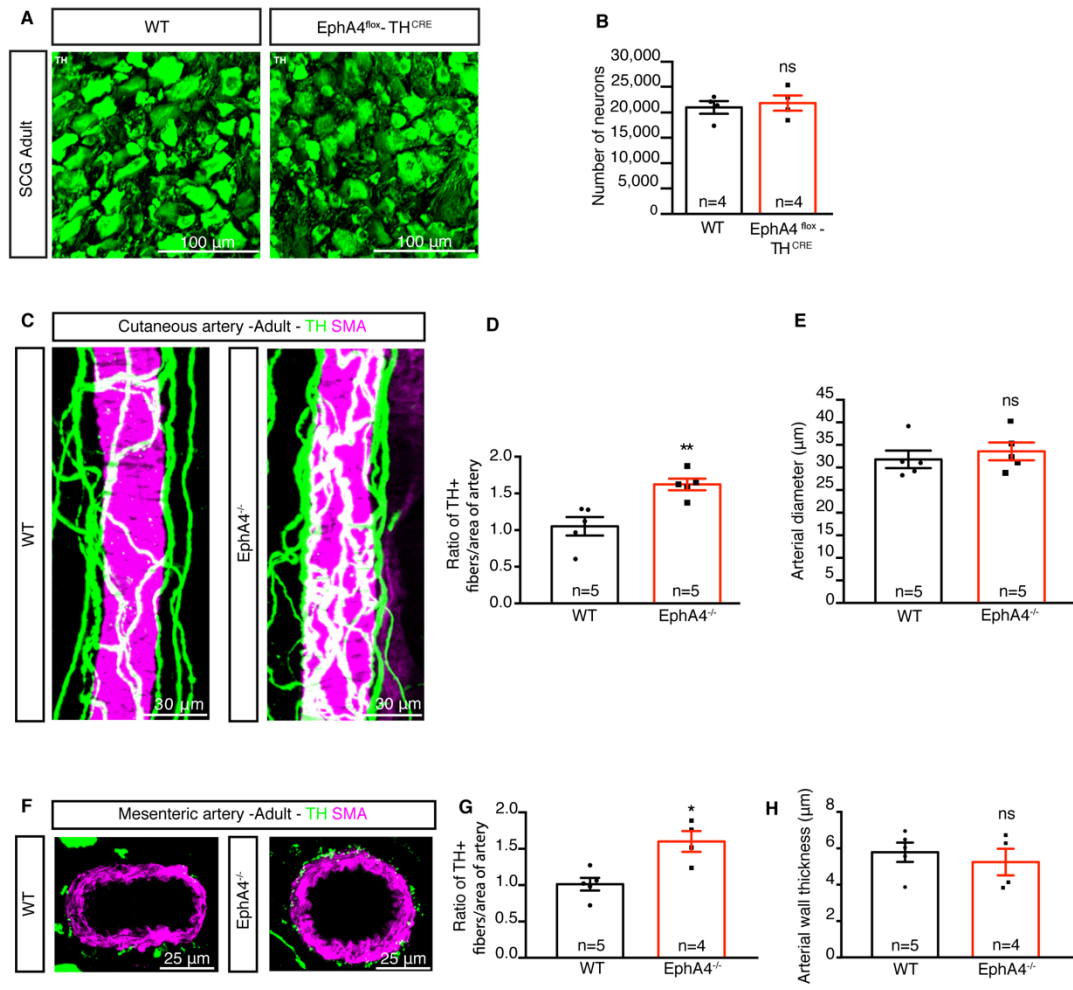

774 **Supplemental Figure 2. Enhanced arterial innervation in genetically inactivated**  
775 **EphA4 adult mice, while number of neurons per sympathetic ganglia remain**  
776 **unchanged.**

777 **(A)** Immunofluorescent staining of a transverse section of SCG from adult WT and  
778 EphA4<sup>flox</sup>-TH<sup>CRE</sup> littermate. Neurons express TH (green). **(B)** Number of TH+ neurons  
779 in an SCG from adult WT and EphA4<sup>flox</sup>-TH<sup>CRE</sup> mice. **(C)** Whole-mount  
780 immunofluorescent staining of cutaneous arteries (ears) from adult WT (left) and  
781 EphA4<sup>-/-</sup> mice (right). Sympathetic nerves expressing TH appear in green whereas  
782 smooth muscle cells expressing SMA are shown in magenta. **(D)** Quantification of TH+  
783 nerve fibers covering cutaneous arteries from adult WT and EphA4<sup>-/-</sup> mice. **(E)**  
784 Quantification of the diameter of cutaneous arteries from adult WT and EphA4<sup>-/-</sup> mice.  
785 **(F)** Immunofluorescent staining of sections of mesenteric arteries from adult WT and  
786 EphA4<sup>-/-</sup> mice stained for TH (green), SMA (magenta). **(G)** Quantification of TH+ nerve  
787 fibers on mesenteric arteries from adult WT and EphA4<sup>-/-</sup> mice. **(H)** Quantification of  
788 the diameter of mesenteric arteries from adult WT and EphA4<sup>-/-</sup> mice.

789 ns: not significant; \*p<0.05; \*\*p<0.01.

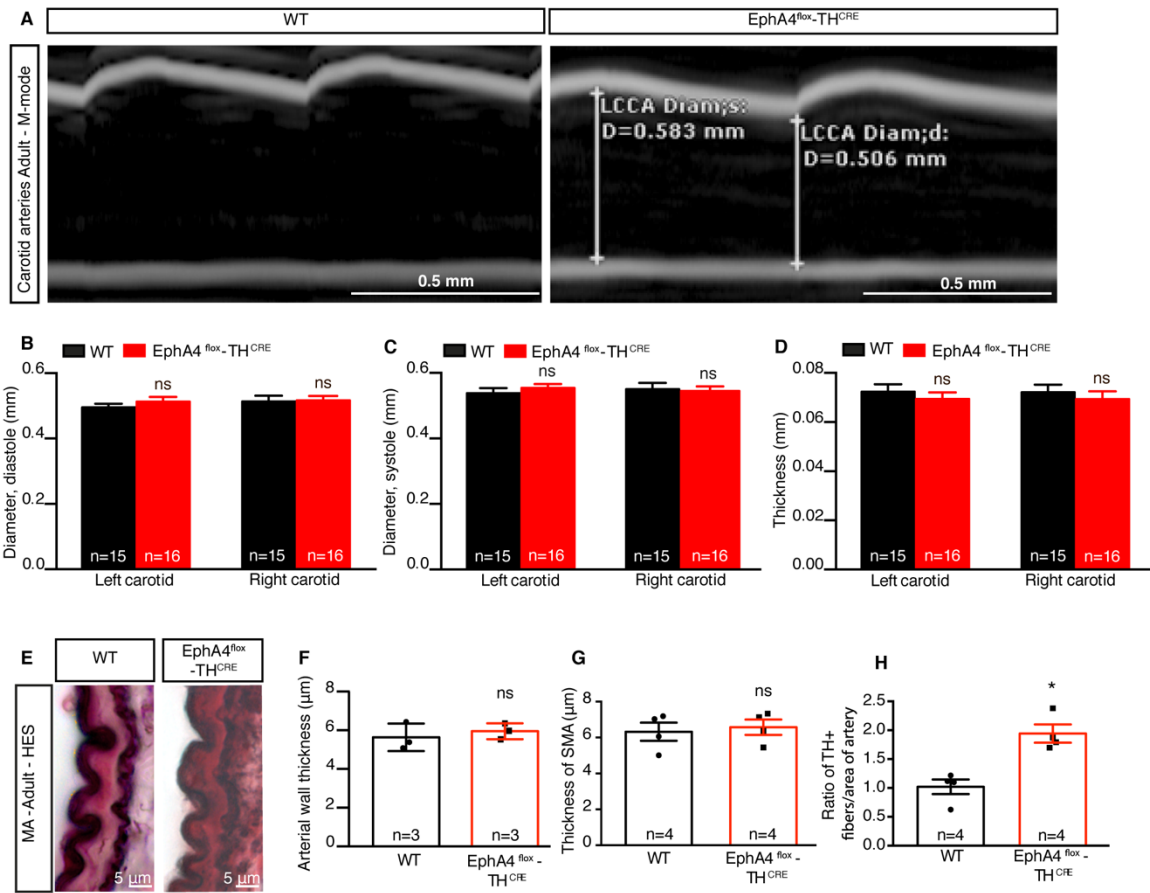

790 **Supplemental Figure 3. Arterial wall properties with normal or enhanced**  
791 **sympathetic innervation.**

792 **(A)** M-mode representative images of the Left Common Carotid Arteries (LCCA) from  
793 adult WT and EphA4<sup>flox</sup>-TH<sup>CRE</sup> mice. Diameter was quantified during diastole and  
794 systole phases. **(B and C)** Quantification of carotid diameter during diastole **(B)** and  
795 during systole **(C)** of the left and right common carotids of adult WT and EphA4<sup>flox</sup>-  
796 TH<sup>CRE</sup> mice. **(D)** Quantification of thickness of left and right common carotids from adult  
797 WT and EphA4<sup>flox</sup>-TH<sup>CRE</sup> littermates. **(E)** Transverse sections of mesenteric arteries  
798 from adult WT and EphA4<sup>flox</sup>-TH<sup>CRE</sup> littermate, colored with HES (hematoxylin eosin  
799 and sirius red). **(F)** Quantification of the arterial wall thickness of mesenteric arteries  
800 from adult WT and EphA4<sup>flox</sup>-TH<sup>CRE</sup> mice. **(G)** Quantification of the arterial wall  
801 thickness of mesenteric arteries from adult WT and EphA4<sup>flox</sup>-TH<sup>CRE</sup> mice  
802 (immunofluorescent staining of SMA was used). **(H)** Quantification of TH+ nerve fibers  
803 covering mesenteric arteries from sections quantified in **(F and G)**.

804 ns: not significant; \*p<0.05.

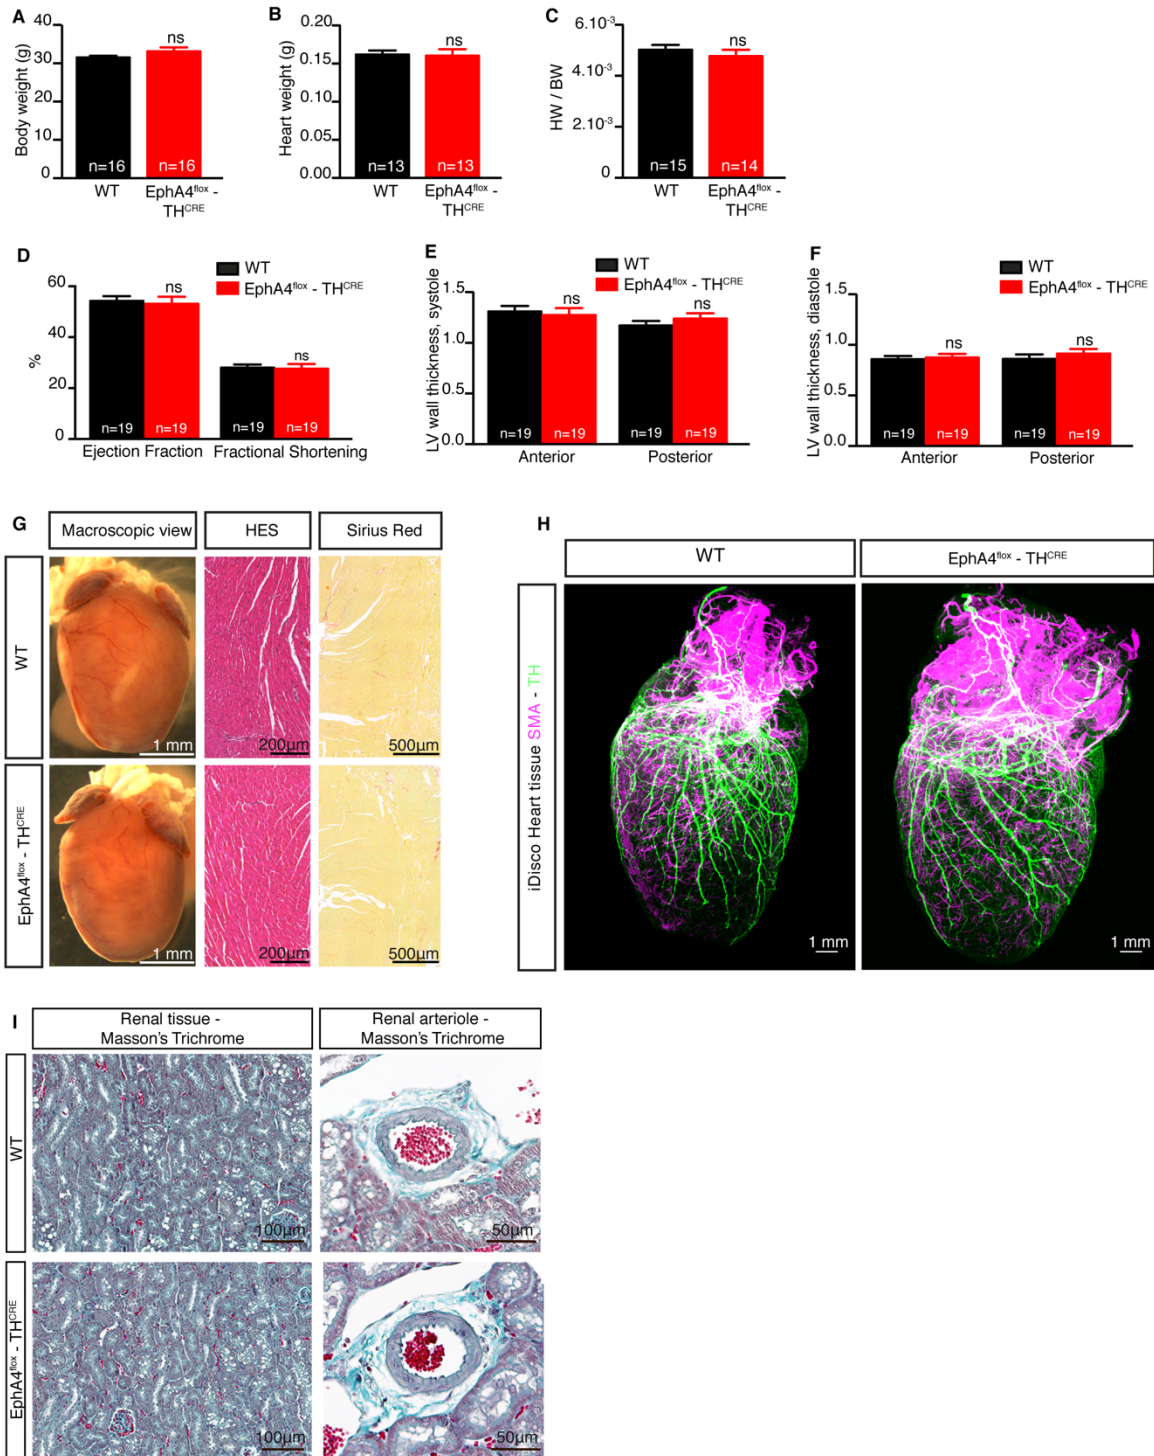

805 **Supplemental Figure 4. Characterization of EphA4<sup>flox</sup>-TH<sup>CRE</sup> mice body weight,**  
806 **heart and kidney.**

807 **(A)** Body weight of adult WT and EphA4<sup>flox</sup>-TH<sup>CRE</sup> littermates. **(B)** Heart weight of adult  
808 WT and EphA4<sup>flox</sup>-TH<sup>CRE</sup> mice. **(C)** Ratio of heart weight to body weight of adult WT  
809 and EphA4<sup>flox</sup>-TH<sup>CRE</sup> mice. **(D)** Quantification of the percentage of ejection fraction and  
810 fractional shortening of hearts from adult WT and EphA4<sup>flox</sup>-TH<sup>CRE</sup> mice. **(E and F)**  
811 Anterior and posterior left ventricular wall thickness during systole **(E)** and diastole **(F)**  
812 from adult WT and EphA4<sup>flox</sup>-TH<sup>CRE</sup> mice. **(G)** Macroscopic view (left panel) and  
813 transverse sections of heart from adult WT and EphA4<sup>flox</sup>-TH<sup>CRE</sup> mice, colored with  
814 HES (hematoxylin, eosin and sirius red, middle) and Sirius Red alone (right). **(H)**  
815 Snapshots of a 3D view of cleared hearts from adult WT and EphA4<sup>flox</sup>-TH<sup>CRE</sup> mice  
816 (Imaris software). Nerve fibers expressing TH are marked in green, arteries labeled  
817 with SMA appear in magenta. **(I)** Transverse sections of kidneys from adult WT and  
818 EphA4<sup>flox</sup>-TH<sup>CRE</sup> mice, colored with Masson's Trichrome, renal tissue (left) and close-  
819 up view of renal arteriole (right).  
820 ns: not significant



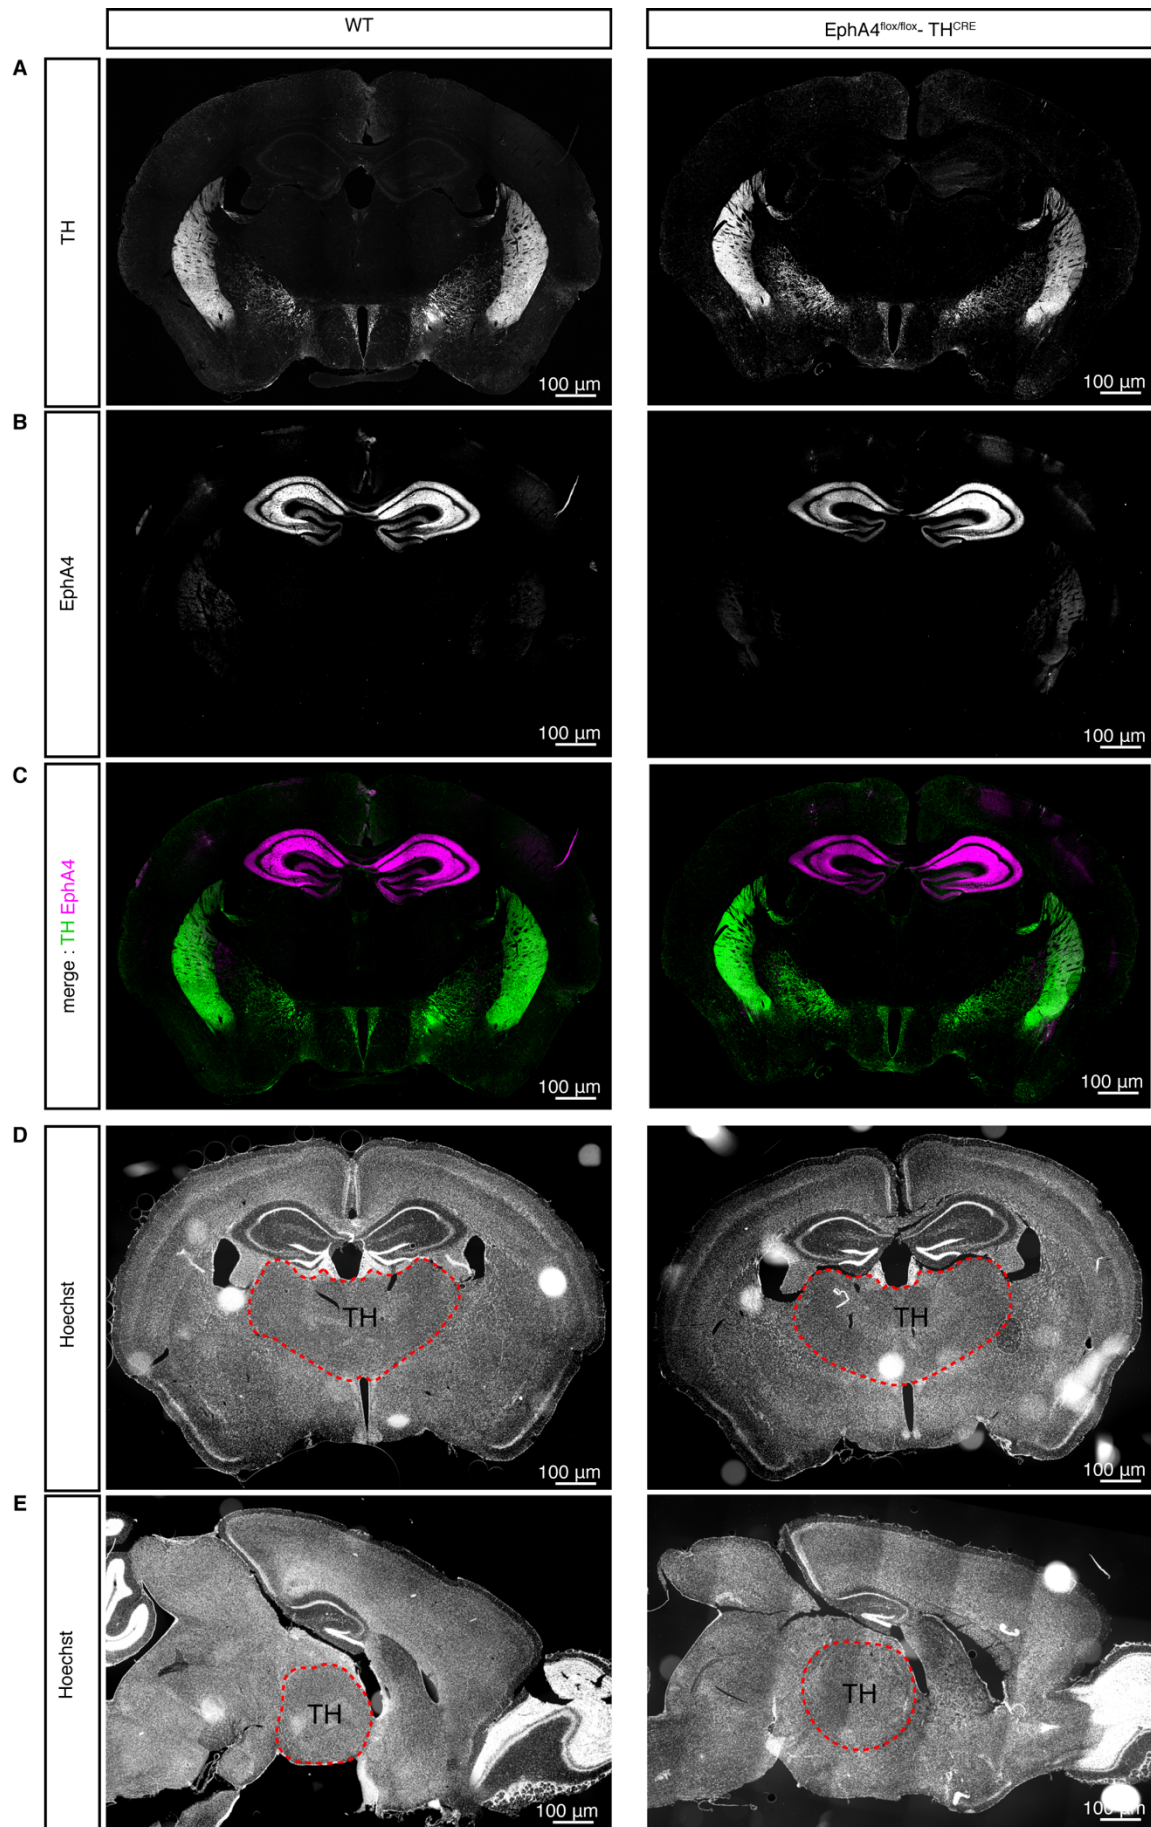

821 **Supplemental Figure 5. Central Nervous System (CNS) expression of TH and**  
822 **EPHA4 in WT and EphA4<sup>flox</sup>-TH<sup>CRE</sup> mice.**

823 **(A-C)** Immunofluorescent staining of an adult brain coronal section of WT and  
824 EphA4<sup>flox</sup>-TH<sup>CRE</sup> mice. Neurons express TH (green) and EphA4 (magenta). Note no  
825 colocalization of EphA4 and TH staining. **(D and E)** Immunofluorescent staining of a  
826 coronal **(D)** and sagittal **(E)** sections of a brain from an adult WT and EphA4<sup>flox</sup>-TH<sup>CRE</sup>  
827 mice. Nucleus are stained with Hoechst.
